# Supplementary material
Source: HighWire-hosted journal article supplement (https://cmajopen.ca/highwire/filestream/89697/field_highwire_adjunct_files/5/open-2022-0130-original-submission.pdf)
Supplement: open-2022-0130-original-submission.pdf [file open-2022-0130-original-submission.pdf]

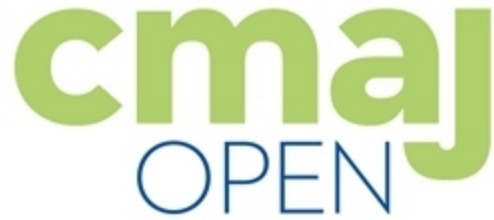

**Health equity considerations in guideline development: A rapid scoping review**

|                               |                                                                                                                                                                                                                                                                                                                                                                                                                                                                                                                                                                                                                                                                                                                                                                                                                                                                                                                                                  |
|-------------------------------|--------------------------------------------------------------------------------------------------------------------------------------------------------------------------------------------------------------------------------------------------------------------------------------------------------------------------------------------------------------------------------------------------------------------------------------------------------------------------------------------------------------------------------------------------------------------------------------------------------------------------------------------------------------------------------------------------------------------------------------------------------------------------------------------------------------------------------------------------------------------------------------------------------------------------------------------------|
| Journal:                      | <i>CMAJ Open</i>                                                                                                                                                                                                                                                                                                                                                                                                                                                                                                                                                                                                                                                                                                                                                                                                                                                                                                                                 |
| Manuscript ID                 | CMAJOpen-2022-0130                                                                                                                                                                                                                                                                                                                                                                                                                                                                                                                                                                                                                                                                                                                                                                                                                                                                                                                               |
| Manuscript Type:              | Systematic review/Meta-analysis                                                                                                                                                                                                                                                                                                                                                                                                                                                                                                                                                                                                                                                                                                                                                                                                                                                                                                                  |
| Date Submitted by the Author: | 03-Jun-2022                                                                                                                                                                                                                                                                                                                                                                                                                                                                                                                                                                                                                                                                                                                                                                                                                                                                                                                                      |
| Complete List of Authors:     | Shaver, Nicole; University of Ottawa Faculty of Medicine, School of Epidemiology and Public Health<br>Bennett, Alexandria; University of Ottawa Faculty of Medicine, School of Epidemiology and Public Health<br>Beck, Andrew; University of Ottawa Faculty of Medicine, School of Epidemiology and Public Health<br>Skidmore, Becky; Independent Research Specialist<br>Traversy, Gregory; Public Health Agency of Canada, Centre for Chronic Disease Prevention and Health Equity<br>Brouwers, Melissa; University of Ottawa Faculty of Medicine, School of Epidemiology and Public Health<br>Little, Julian; University of Ottawa Faculty of Medicine, School of Epidemiology and Public Health<br>Moher, David; Ottawa Hospital Research Institute, Clinical Epidemiology Program<br>Moore, Ainsley; McMaster University, Family Medicine; McMaster University, Family Medicine<br>Persaud, Navindra; St Michael's Hospital, Family Medicine |
| Keywords:                     | Systematic review, Clinical Practice Guidelines                                                                                                                                                                                                                                                                                                                                                                                                                                                                                                                                                                                                                                                                                                                                                                                                                                                                                                  |
| More Detailed Keywords:       | Scoping review, Health equity                                                                                                                                                                                                                                                                                                                                                                                                                                                                                                                                                                                                                                                                                                                                                                                                                                                                                                                    |
| Abstract:                     | <p><b>Background:</b><br/>           To determine current best practices to integrate health equity into the guideline development process and the benefits and/or drawbacks of these practices.</p> <p><b>Methods:</b><br/>           We searched Ovid MEDLINE® ALL and Embase Classic+Embase on the Ovid platform, CINAHL on Ebsco, and Web of Science from 2010 to 2020. We searched grey literature from 2015 to 2020, using the Canadian Agency for Drugs and Technologies in Health (CADTH) Grey Matters checklist and searches of potentially relevant websites. Articles were screened independently by one reviewer. Proposed best practices, advantages/disadvantages, and tools were extracted independently by one reviewer and qualitatively synthesized based on the relevant steps</p>                                                                                                                                            |

1  
2  
3  
4  
5  
6  
7  
8  
9  
10  
11  
12  
13  
14  
15  
16  
17  
18  
19  
20  
21  
22  
23  
24  
25  
26  
27  
28  
29  
30  
31  
32  
33  
34  
35  
36  
37  
38  
39  
40  
41  
42  
43  
44  
45  
46  
47  
48  
49  
50  
51  
52  
53  
54  
55  
56  
57  
58  
59  
60

|  |                                                                                                                                                                                                                                                                                                                                                                                                                                                                                                                                                                                                                                                                                                                                                                                                                                                                                                                                                                                                                                                                                                                                      |
|--|--------------------------------------------------------------------------------------------------------------------------------------------------------------------------------------------------------------------------------------------------------------------------------------------------------------------------------------------------------------------------------------------------------------------------------------------------------------------------------------------------------------------------------------------------------------------------------------------------------------------------------------------------------------------------------------------------------------------------------------------------------------------------------------------------------------------------------------------------------------------------------------------------------------------------------------------------------------------------------------------------------------------------------------------------------------------------------------------------------------------------------------|
|  | <p>of a comprehensive checklist covering the stages of guideline development.</p> <p>Results:<br/>We included (n=21) articles that proposed best practices for incorporating health equity within the guideline development process. These practices were organized under different stages of the guideline development process including guideline planning, evidence review, guideline development, and dissemination. Included studies provided best practices from guideline producers, articles discussing health equity in current guidelines, articles addressing strategies to increase equity in the guideline implementation process, and literature reviews of promising health equity practices.</p> <p>Interpretation:<br/>Our scoping review identified best practices to incorporate health equity considerations at each phase of guideline development. Identified practices may be used to inform equity-promoting strategies with the guideline development process, however guideline producers should carefully consider the advantages and disadvantages of best practices when integrating health equity.</p> |
|  |                                                                                                                                                                                                                                                                                                                                                                                                                                                                                                                                                                                                                                                                                                                                                                                                                                                                                                                                                                                                                                                                                                                                      |

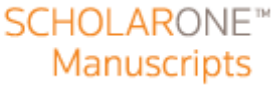

## Preferred Reporting Items for Systematic reviews and Meta-Analyses extension for Scoping Reviews (PRISMA-ScR) Checklist

| SECTION                                               | ITEM | PRISMA-ScR CHECKLIST ITEM                                                                                                                                                                                                                                                                                  | REPORTED ON PAGE # |
|-------------------------------------------------------|------|------------------------------------------------------------------------------------------------------------------------------------------------------------------------------------------------------------------------------------------------------------------------------------------------------------|--------------------|
| <b>TITLE</b>                                          |      |                                                                                                                                                                                                                                                                                                            |                    |
| Title                                                 | 1    | Identify the report as a scoping review.                                                                                                                                                                                                                                                                   | 1                  |
| <b>ABSTRACT</b>                                       |      |                                                                                                                                                                                                                                                                                                            |                    |
| Structured summary                                    | 2    | Provide a structured summary that includes (as applicable): background, objectives, eligibility criteria, sources of evidence, charting methods, results, and conclusions that relate to the review questions and objectives.                                                                              | 3                  |
| <b>INTRODUCTION</b>                                   |      |                                                                                                                                                                                                                                                                                                            |                    |
| Rationale                                             | 3    | Describe the rationale for the review in the context of what is already known. Explain why the review questions/objectives lend themselves to a scoping review approach.                                                                                                                                   | 4                  |
| Objectives                                            | 4    | Provide an explicit statement of the questions and objectives being addressed with reference to their key elements (e.g., population or participants, concepts, and context) or other relevant key elements used to conceptualize the review questions and/or objectives.                                  | 4                  |
| <b>METHODS</b>                                        |      |                                                                                                                                                                                                                                                                                                            |                    |
| Protocol and registration                             | 5    | Indicate whether a review protocol exists; state if and where it can be accessed (e.g., a Web address); and if available, provide registration information, including the registration number.                                                                                                             | 4                  |
| Eligibility criteria                                  | 6    | Specify characteristics of the sources of evidence used as eligibility criteria (e.g., years considered, language, and publication status), and provide a rationale.                                                                                                                                       | 5,8                |
| Information sources*                                  | 7    | Describe all information sources in the search (e.g., databases with dates of coverage and contact with authors to identify additional sources), as well as the date the most recent search was executed.                                                                                                  | 4,5                |
| Search                                                | 8    | Present the full electronic search strategy for at least 1 database, including any limits used, such that it could be repeated.                                                                                                                                                                            | Appendix B         |
| Selection of sources of evidence†                     | 9    | State the process for selecting sources of evidence (i.e., screening and eligibility) included in the scoping review.                                                                                                                                                                                      | 5                  |
| Data charting process‡                                | 10   | Describe the methods of charting data from the included sources of evidence (e.g., calibrated forms or forms that have been tested by the team before their use, and whether data charting was done independently or in duplicate) and any processes for obtaining and confirming data from investigators. | 5                  |
| Data items                                            | 11   | List and define all variables for which data were sought and any assumptions and simplifications made.                                                                                                                                                                                                     | 5,6                |
| Critical appraisal of individual sources of evidence§ | 12   | If done, provide a rationale for conducting a critical appraisal of included sources of evidence; describe the methods used and how this information was used in any data synthesis (if appropriate).                                                                                                      | N/A                |

| SECTION                                       | ITEM | PRISMA-ScR CHECKLIST ITEM                                                                                                                                                                       | REPORTED ON PAGE # |
|-----------------------------------------------|------|-------------------------------------------------------------------------------------------------------------------------------------------------------------------------------------------------|--------------------|
| Synthesis of results                          | 13   | Describe the methods of handling and summarizing the data that were charted.                                                                                                                    | 5,6                |
| <b>RESULTS</b>                                |      |                                                                                                                                                                                                 |                    |
| Selection of sources of evidence              | 14   | Give numbers of sources of evidence screened, assessed for eligibility, and included in the review, with reasons for exclusions at each stage, ideally using a flow diagram.                    | 6                  |
| Characteristics of sources of evidence        | 15   | For each source of evidence, present characteristics for which data were charted and provide the citations.                                                                                     | 6, 10-13           |
| Critical appraisal within sources of evidence | 16   | If done, present data on critical appraisal of included sources of evidence (see item 12).                                                                                                      | N/A                |
| Results of individual sources of evidence     | 17   | For each included source of evidence, present the relevant data that were charted that relate to the review questions and objectives.                                                           | 6,14-18            |
| Synthesis of results                          | 18   | Summarize and/or present the charting results as they relate to the review questions and objectives.                                                                                            | 14-18              |
| <b>DISCUSSION</b>                             |      |                                                                                                                                                                                                 |                    |
| Summary of evidence                           | 19   | Summarize the main results (including an overview of concepts, themes, and types of evidence available), link to the review questions and objectives, and consider the relevance to key groups. | 6                  |
| Limitations                                   | 20   | Discuss the limitations of the scoping review process.                                                                                                                                          | 7                  |
| Conclusions                                   | 21   | Provide a general interpretation of the results with respect to the review questions and objectives, as well as potential implications and/or next steps.                                       | 7                  |
| <b>FUNDING</b>                                |      |                                                                                                                                                                                                 |                    |
| Funding                                       | 22   | Describe sources of funding for the included sources of evidence, as well as sources of funding for the scoping review. Describe the role of the funders of the scoping review.                 | 2                  |

JBI = Joanna Briggs Institute; PRISMA-ScR = Preferred Reporting Items for Systematic reviews and Meta-Analyses extension for Scoping Reviews.

\* Where *sources of evidence* (see second footnote) are compiled from, such as bibliographic databases, social media platforms, and Web sites.

† A more inclusive/heterogeneous term used to account for the different types of evidence or data sources (e.g., quantitative and/or qualitative research, expert opinion, and policy documents) that may be eligible in a scoping review as opposed to only studies. This is not to be confused with *information sources* (see first footnote).

‡ The frameworks by Arksey and O'Malley (6) and Levac and colleagues (7) and the JBI guidance (4, 5) refer to the process of data extraction in a scoping review as data charting.

§ The process of systematically examining research evidence to assess its validity, results, and relevance before using it to inform a decision. This term is used for items 12 and 19 instead of "risk of bias" (which is more applicable to systematic reviews of interventions) to include and acknowledge the various sources of evidence that may be used in a scoping review (e.g., quantitative and/or qualitative research, expert opinion, and policy document).

From: Tricco AC, Lillie E, Zarin W, O'Brien KK, Colquhoun H, Levac D, et al. PRISMA Extension for Scoping Reviews (PRISMA-ScR): Checklist and Explanation. *Ann Intern Med.* 2018;169:467–473. doi: 10.7326/M18-0850.

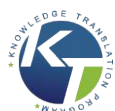

## Health equity considerations in guideline development: A rapid scoping review

Nicole Shaver\*<sup>1</sup>, Alexandria Bennett\*<sup>1</sup>, Andrew Beck<sup>1</sup>, Becky Skidmore<sup>2</sup>, Gregory Traversy<sup>3</sup>,  
Melissa Brouwers<sup>1</sup>, Julian Little<sup>1</sup>, David Moher<sup>1,4</sup>, Ainsley Moore<sup>5†</sup>, Navindra Persaud<sup>6</sup>

<sup>1</sup>School of Epidemiology and Public Health, Faculty of Medicine, University of Ottawa, Ottawa, Ontario, Canada

<sup>2</sup>Independent Information Specialist, Ottawa, Ontario, Canada

<sup>3</sup>Centre for Chronic Disease Prevention and Health Equity, Public Health Agency of Canada, Ottawa, Canada

<sup>4</sup>Clinical Epidemiology Program, Ottawa Hospital Research Institute, Ottawa, Ontario, Canada

<sup>5</sup>Department of Family Medicine, McMaster University, Hamilton Ontario, Canada

<sup>6</sup>Department of Family and Community Medicine, St. Michael's Hospital, Toronto, Ontario, Canada

\**Contributed equally to this work.*

† Dr. Ainsley Moore died June 25, 2021.

Corresponding author: [d.bennett@uottawa.ca](mailto:d.bennett@uottawa.ca)

1  
2  
3 **Declarations**  
4

5 *Author's contributions*  
6

7 NS, ABennett: Conceptualization, project administration, methodology, writing original draft, and  
8 revisions.  
9

10 ABeck: Methodology, writing original draft, and revisions.  
11

12 BS: Review and editing, search strategy.  
13

14 MB, JL, DM: Funding acquisition, methodology, review, and editing.  
15

16 GT, AM, NP: Conceptualization, review, and editing.  
17  
18

19 *Funding*  
20

21 Funding for this manuscript is provided by the Public Health Agency of Canada through the  
22 Jewish General Hospital (Montreal, Canada). The views expressed herein do not necessarily  
23 represent the views of the Public Health Agency of Canada.  
24

25 *Data sharing*  
26

27 All data presented are available in the published record and the protocol and full report are  
28 available on the Open Science Framework (<https://osf.io/skvnx/>).  
29  
30  
31  
32  
33  
34  
35  
36  
37  
38  
39  
40  
41  
42  
43  
44  
45  
46  
47  
48  
49  
50  
51  
52  
53  
54  
55  
56  
57  
58  
59  
60

## Abstract

### *Background:*

To determine current best practices to integrate health equity into the guideline development process and the benefits and/or drawbacks of these practices.

### *Methods:*

We searched Ovid MEDLINE® ALL and Embase Classic+Embase on the Ovid platform, CINAHL on Ebsco, and Web of Science from 2010 to 2020. We searched grey literature from 2015 to 2020, using the Canadian Agency for Drugs and Technologies in Health (CADTH) Grey Matters checklist and searches of potentially relevant websites. Articles were screened independently by one reviewer. Proposed best practices, advantages/disadvantages, and tools were extracted independently by one reviewer and qualitatively synthesized based on the relevant steps of a comprehensive checklist covering the stages of guideline development.

### *Results:*

We included (n=21) articles that proposed best practices for incorporating health equity within the guideline development process. These practices were organized under different stages of the guideline development process including guideline planning, evidence review, guideline development, and dissemination. Included studies provided best practices from guideline producers, articles discussing health equity in current guidelines, articles addressing strategies to increase equity in the guideline implementation process, and literature reviews of promising health equity practices.

### *Interpretation:*

Our scoping review identified best practices to incorporate health equity considerations at each phase of guideline development. Identified practices may be used to inform equity-promoting strategies with the guideline development process, however guideline producers should carefully consider the advantages and disadvantages of best practices when integrating health equity.

## Introduction

The attainment of the highest possible standard of health for all is a fundamental human right.(1) Over the past two decades, many countries and global organizations have undertaken measures to reduce health inequities,(2–4) which are defined as avoidable differences in health that are considered unfair and unjust but modifiable.(5,6) Factors that contribute to unfair and avoidable differences in health are diverse, complex, and interdependent.(7) Populations that are marginalized due to social, economic or environmental factors may face a higher burden of disease or poorer health outcomes due to structural inequities that result in an unequal allocation of power and resources.(7,8) These issues may be further compounded due to a differential ability (or opportunity) to access or use the full spectrum of healthcare.(9) For these reasons, health equity has been increasingly recognized as a vital consideration in clinical practice, public health, and policymaking.(2,10–13)

Evidence-based clinical practice guidelines have the potential to reduce health inequities and improve care among disadvantaged populations.(14–16) Guidelines can also unintentionally create or exacerbate existing health inequities between populations.(14,16–19) For example, guidelines may not consider the effects of socioeconomic status(20) or recommend an inaccessible diagnostic or treatment, thus widening health disparities. Indeed, guidelines that solely consider evidence of effectiveness of clinical options as a foundation for the recommendations without consideration of the evidence related to their implementability, acceptability, feasibility, and capacity to mitigate disparities do not meet international standards of quality.(21) For these reasons, the objective of this scoping review is to identify current best practices to integrate health equity into guideline development and the benefits and/or drawbacks of these practices.

## Methods

### *Study design*

The full protocol for this scoping review and full report is available on the Open Science Framework (<https://osf.io/skvnx/>). Levac and colleagues' update of the Arksey and O'Malley methodological framework for scoping reviews guided this review.(22,23) We also followed the methodology manual published by the Joanna Briggs Institute for scoping reviews,(24,25) where applicable.

### *Literature search*

An experienced medical information specialist (BS) developed and tested the search strategies through an iterative process in consultation with the review team. Another senior information specialist peer-reviewed the strategies prior to execution using the PRESS Checklist (see **Appendix A**).(26) Using the multifile option in Ovid, we searched Ovid MEDLINE® ALL and Embase Classic+Embase. We also searched CINAHL (Ebsco) and the Web of Science Core Collection. All searches were conducted on 23 November 2020. Strategies utilized a combination of controlled vocabulary (e.g., "Guidelines as Topic") and guideline-related keywords in proximity to terms representing either processes (e.g., develop, framework, process) or disadvantaged populations (e.g., disparity, inequity, underserved). Vocabulary and syntax were adjusted across databases. Where possible, animal-only and opinion pieces were removed. There were no language restrictions on any of the searches, but results were limited



1  
2  
3 to publication dates from 2010 onwards. Results were downloaded and deduplicated using  
4 EndNote version 9.3.3 (Clarivate Analytics). The full strategies can be found in **Appendix B**.  
5

6 We conducted a targeted search of the grey literature to identify relevant non-indexed and  
7 unpublished literature using the Canadian Agency for Drugs and Technologies in Health  
8 (CADTH) Grey Matters checklist(27) and through searches of potentially relevant websites (see  
9 **Appendix C**). Grey literature searches were limited to English language documents published  
10 from 2015 to 2020.  
11

### 12 *Study eligibility criteria*

13  
14  
15 **Table 1** outlines the study inclusion and exclusion criteria. Relevant studies were included if  
16 they described procedures or processes, regardless of method, that address health equity in the  
17 guideline development process. Articles that described equity promotion practices in primary  
18 research studies (e.g., promoting health equity when conducting randomized clinical trials) or  
19 systematic reviews (only) were excluded.  
20

### 21 *Study selection*

22  
23  
24 The article selection process consisted of two phases of screening: 1) title and abstract review  
25 and 2) full-text review. Following the removal of duplicates, the titles and abstracts of all  
26 references identified in our search were uploaded into Covidence Software for screening.(28) A  
27 pilot screening exercise occurred before each phase of screening to ensure inter-rater reliability  
28 and determine the adequacy of the screening criteria. For both phases, screening was  
29 performed by one reviewer using the eligibility criteria described above. A second reviewer  
30 assisted with any uncertain references. A PRISMA flowchart detailing the screening process  
31 and list of excluded studies during full-text screening can be found in **Appendix D**.  
32

### 33 *Charting the data*

34  
35  
36 All included full-text articles were reviewed and charted by one reviewer using a pilot-tested  
37 data abstraction form. Data abstraction was completed using NVivo Software (released in  
38 March 2020).(29) We captured data items related to study characteristics, including author and  
39 organization, study design, the article's aim, and a description of the population and setting.  
40 When articles provided equity recommendations specifically for guidelines, we extracted best  
41 practices as they relate to the stages of the guideline development process (based on a  
42 comprehensive guideline development checklist).(30) The benefits and drawbacks of these  
43 approaches as described by the authors were also extracted, if available. Approaches that fell  
44 outside the guideline development process (e.g., health equity-promoting practices related to  
45 organizational leadership, budgeting, training) were extracted and qualitatively synthesized by  
46 considering common themes. We did not formally appraise the methodological quality of  
47 included articles due to a lack of methodological tools suited to this purpose. Additionally, our  
48 aim was to map any available evidence, either from the peer-reviewed or grey literature, rather  
49 than identify the highest-quality evidence to answer a specific key question related to policy or  
50 practice.(24)  
51

### 52 *Data analysis*

53  
54  
55 We describe our results using a narrative summary. Results are organized based on major  
56 steps in the guideline development process as described by Shi and colleagues,(31) a  
57  
58  
59  
60

1  
2  
3 comprehensive guideline development checklist.(30) Tables are included to summarize included  
4 study characteristics, as well as methods for incorporating equity in guidelines, advantages or  
5 disadvantages of these approaches, and relevant tools.  
6

### 7 *Ethics approval*

8  
9 We did not require ethics approval for this study.  
10

## 11 **Results**

12  
13 A total of 21 articles proposed best practices for incorporating health equity within the guideline  
14 development process. Study characteristics are presented in **Table 2**. Five articles focused on a  
15 specific population or subgroup including indigenous populations,(32) individuals with  
16 intellectual disabilities,(19) minority ethnic groups,(33) individuals with lived experience of  
17 homelessness,(34) and gender groups.(35) Key sources included the GRADE equity guideline  
18 series published in 2017, which provided guidance and examples on considering equity at key  
19 stages of the guideline development process.(16,36–38) Shi et al. 2014 conducted a systematic  
20 review, which synthesized methods for incorporating equity in clinical practice guidelines.(31)  
21 Other articles included sources that provided best practices from guideline  
22 producers,(32,33,39–42) articles discussing health equity in current guidelines,(2,19,43–45)  
23 articles addressing strategies to increase equity in the guideline implementation  
24 process,(14,34,46) and literature reviews of health equity practices.(35,47)  
25  
26

27 **Table 3** provides a summary of best practices for incorporating health equity within the guideline  
28 development process. We structured the results using the relevant steps of a comprehensive  
29 checklist covering the stages of guideline development.(30) The topics were then organized  
30 under four headings: 1) guideline planning, 2) evidence review, 3) guideline development, and  
31 4) dissemination.  
32  
33

## 34 **Interpretation**

35  
36 Our scoping review found substantive recommendations on best practices to incorporate health  
37 equity during four phases of guideline development (guideline planning, evidence review,  
38 guideline development and dissemination). We included 21 articles from peer-reviewed and  
39 grey literature sources, including reports from federal and provincial agencies, community health  
40 centers, and international guideline producers.  
41  
42

43 Despite the evidence base on health equity promotion in guideline development, few reviews  
44 have been completed on this topic. A narrative literature review was published in 2011(48) and  
45 a more comprehensive systematic review followed in 2014 by Shi and colleagues.(31) Since the  
46 2014 review, several new articles have been published, including the GRADE equity series,  
47 which provided comprehensive guidance and real-world examples regarding equity promotion in  
48 guidelines. Our review captured these new articles and compiled additional sources related to  
49 health equity promotion, including health equity toolkits, articles on interventions to increase  
50 equity in primary care delivery, and organizational health equity plans. We also captured  
51 potential advantages and disadvantages of the proposed best practices as identified by the  
52 study authors.  
53

54 While equity-related guidance was captured for most of the stages of guideline  
55 development,(30) some gaps in the knowledge base remain. No equity-related guidance was  
56  
57  
58  
59  
60

1  
2  
3 captured to identify or report on conflicts of interest, an important consideration for clinical  
4 guideline producers due to potential vulnerability from industry influence.(49) We identified few  
5 strategies relating to equity promotion in guideline reporting and peer review and the updating of  
6 guidelines. Additionally, there was no discussion on the advantages or disadvantages of best  
7 practices for the final stages, dissemination, and uptake of recommendations. Future research  
8 may need to explore if special considerations related to equity are required for these steps.  
9

10 The aim of this scoping review was to synthesize recommended best practices for addressing  
11 health equity in guidelines. Some equity practices were targeted towards WHO clinical  
12 guidelines and may be less relevant for clinical practice guidelines for primary care practitioners,  
13 for example. Additionally, we limited our discussion of advantages and disadvantages to those  
14 that had been identified in the original articles. There may be additional benefits or limitations to  
15 practices when considering implementation. Finally, developers should remain conscious of  
16 important systemic health and social inequities in our healthcare system when implementing  
17 practices. Clinical and epidemiological research has highlighted the dangers of “othering”  
18 certain patient groups. The provision of separate medical care or recommendations for  
19 populations subgroups, such as in race-based medicine, may further exacerbate health  
20 disparities rather than mitigate them.(50,51)  
21  
22

### 23 *Strengths and Limitations*

24  
25 We chose to conduct a rapid scoping review due to its flexibility and the relevance of broader  
26 evidence from articles from guideline producers and other healthcare organizations to our key  
27 question. This methodology was appropriate for our goal of understanding the concepts and  
28 practices related to health equity promotion. Nevertheless, limitations to our approach should  
29 also be acknowledged. While our search strategy was comprehensive, we may have failed to  
30 capture articles on equity-promoting strategies if they were not explicitly defined as such in the  
31 articles (e.g., tools to facilitate patient engagement). To mitigate this concern and validate our  
32 search strategy, we consulted a content expert to review our excluded studies list. We used a  
33 rapid review methodology (one reviewer screened citations and another validated included  
34 citations). While this may have resulted in relevant practices being missed, it is unlikely to bias  
35 our results, as our goal was to synthesize practices. Finally, a narrative synthesis was used to  
36 analyze and summarize our results. Efforts were made to be systematic in our use of qualitative  
37 data synthesis methods, but we did not follow a formal thematic content analysis process, which  
38 may reduce our review’s reproducibility.  
39  
40

### 41 *Conclusions*

42  
43 Overall, our scoping review found varied evidence on proposed best practices to promote health  
44 equity. Identified practices may be used to inform equity-promoting strategies within the  
45 guideline development process and within the guideline organization itself. While health equity  
46 is a complex issue and guideline organizations must carefully balance the pros and cons of best  
47 practices, our review provides an overview of available strategies and resources to aid guideline  
48 producers in creating a plan to integrate health equity.  
49  
50  
51  
52  
53  
54  
55  
56  
57  
58  
59  
60

## Table and Figures

**Table 1.** Eligibility criteria

| Criterion  | Inclusion                                                                                                                                                                                                                                                                                                                                                                                                                                                                                                                     | Exclusion                                                                                                                                                                                                        |
|------------|-------------------------------------------------------------------------------------------------------------------------------------------------------------------------------------------------------------------------------------------------------------------------------------------------------------------------------------------------------------------------------------------------------------------------------------------------------------------------------------------------------------------------------|------------------------------------------------------------------------------------------------------------------------------------------------------------------------------------------------------------------|
| Population | <ul style="list-style-type: none"> <li>Clinical practice guideline organizations</li> <li>Public health organizations</li> <li>Governmental Organizations</li> <li>Other relevant healthcare/ public health NGOs or associations</li> </ul>                                                                                                                                                                                                                                                                                   |                                                                                                                                                                                                                  |
| Concept    | <ul style="list-style-type: none"> <li>Best practices/processes for addressing health equity in guideline development using the PROGRESS-Plus Framework</li> <li>Benefits or drawbacks of these best practices to address health equity in guideline development</li> <li>Best practices/processes for addressing health equity relevant to health organizations and primary care</li> </ul>                                                                                                                                  | <ul style="list-style-type: none"> <li>Best practices/processes for addressing health equity in primary research</li> <li>Best practices/processes for addressing health equity in systematic reviews</li> </ul> |
| Context    | <ul style="list-style-type: none"> <li>Peer-reviewed studies published in the past 10 years<sup>a</sup></li> <li>Primary research (any study design) or reviews (systematic, meta-analyses, scoping, evidence maps, rapid reviews, literature, evidence syntheses, reviews of reviews, narrative, critical), or guidelines (recommendations, procedural manuals)</li> <li>Grey literature sources published within the last 5 years<sup>a</sup></li> <li>Studies in English</li> <li>No country-based restrictions</li> </ul> |                                                                                                                                                                                                                  |
| Other      |                                                                                                                                                                                                                                                                                                                                                                                                                                                                                                                               | <ul style="list-style-type: none"> <li>Unavailable full text</li> <li>Out-of-date publications that have an updated version of the same publication available</li> </ul>                                         |

<sup>a</sup>Time cut-offs have been selected due to timelines and budget restraints.

**Figure 1.** PRISMA flow diagram and list of excluded full-text studies with reasons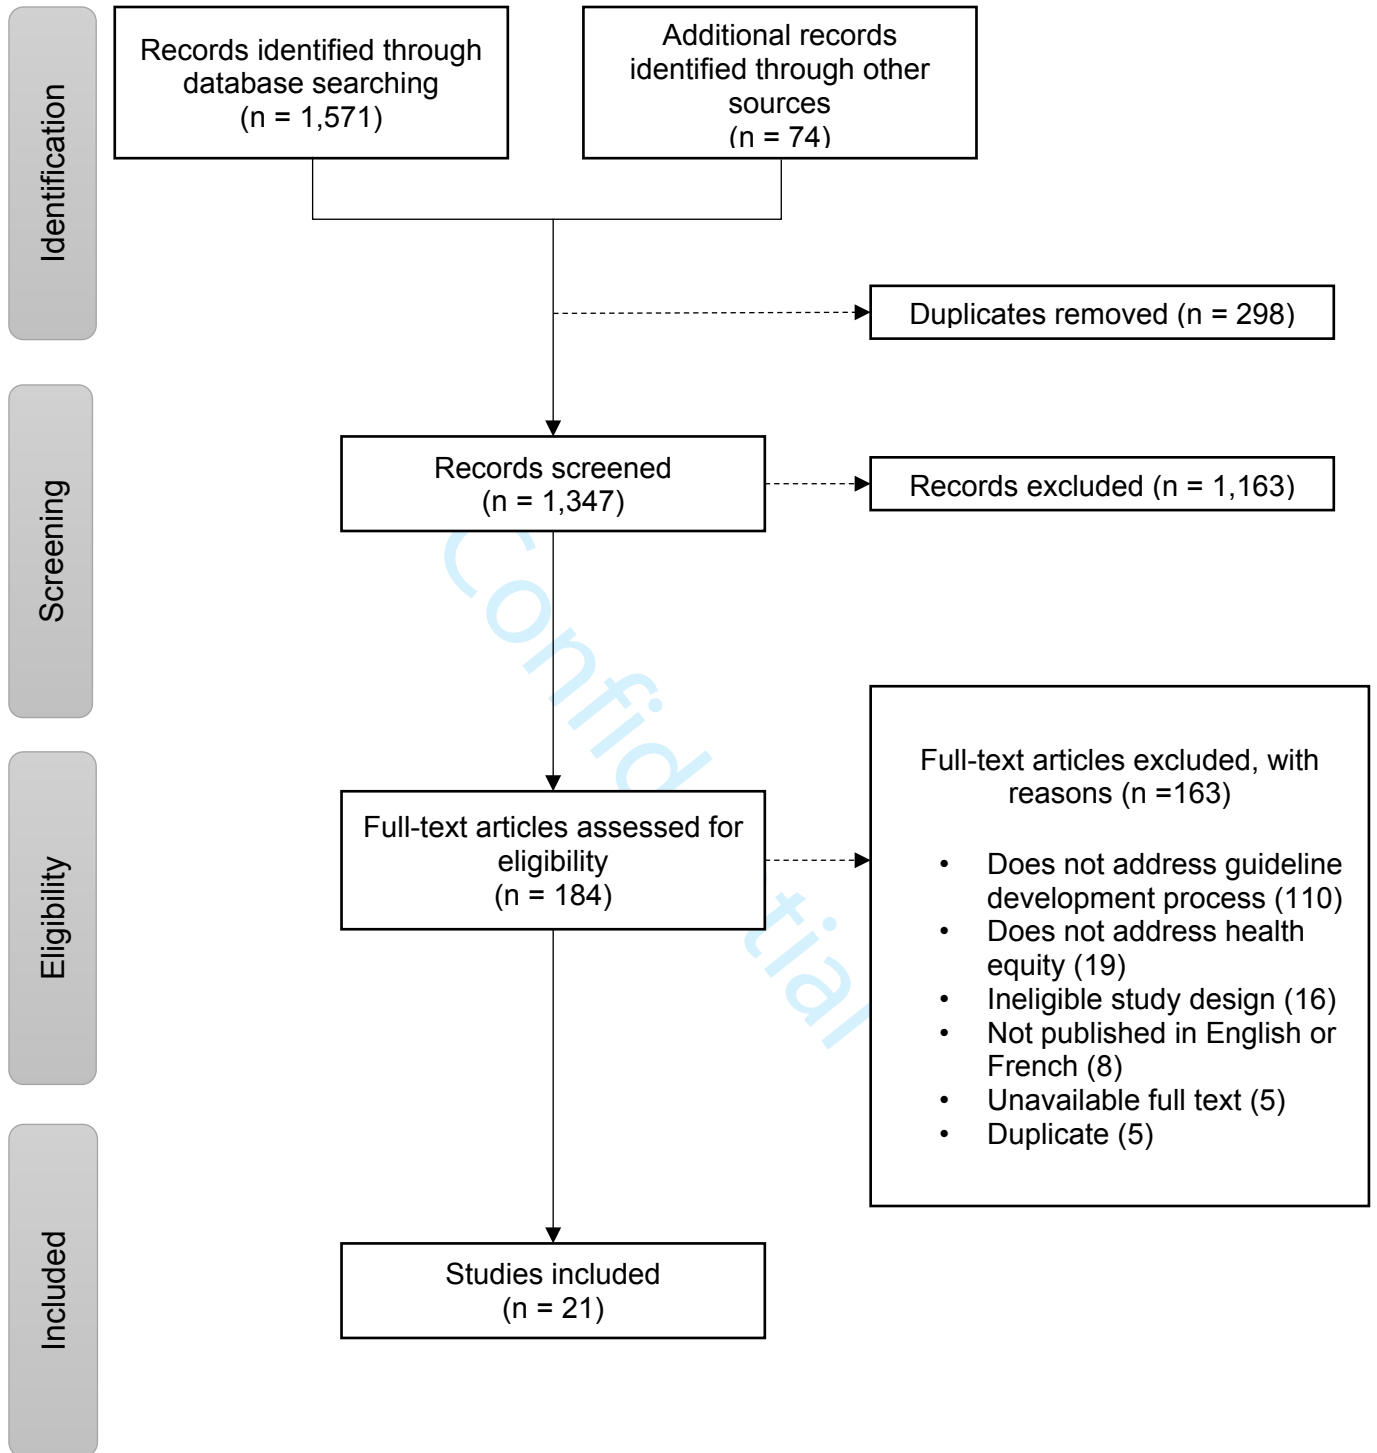

1  
2  
3  
4  
5  
6  
7  
8  
9  
10  
11  
12  
13  
14  
15  
16  
17  
18  
19  
20  
21  
22  
23  
24  
25  
26  
27  
28  
29  
30  
31  
32  
33  
34  
35  
36  
37  
38  
39  
40  
41  
42  
43  
44  
45  
46  
47

**Table 2.** Characteristics and summary of included articles grouped by organization.

| Author (Year), Country                                                | Title                                                                                                                                        | Organization        | Aim                                                                                                                                                                                                                                                                                 | Population    | Setting       | Publication type |
|-----------------------------------------------------------------------|----------------------------------------------------------------------------------------------------------------------------------------------|---------------------|-------------------------------------------------------------------------------------------------------------------------------------------------------------------------------------------------------------------------------------------------------------------------------------|---------------|---------------|------------------|
| <a href="#">Welch et al. (2017)</a> (16)<br>International             | GRADE equity guidelines 1: considering health equity in GRADE guideline development: introduction and rationale                              | GRADE Working Group | The aim of this article is to introduce “the rationale and methods for explicitly considering health equity in the Grading of Recommendations Assessment, Development and Evaluation (GRADE) methodology for development of clinical, public health, and health system guidelines.” | Not Specified | Not Specified | Journal Article  |
| <a href="#">Akl et al. (2017)</a> (38)<br>International               | GRADE equity guidelines 2: considering health equity in GRADE guideline development: equity extension of the guideline development checklist | GRADE Working Group | The objective of this article was to “provide guidance for guideline developers on how to consider equity at key stages of the guideline development process.”                                                                                                                      | Not Specified | Not Specified | Journal Article  |
| <a href="#">Welch et al. (2017)</a> (36)<br>International             | GRADE equity guidelines 3: considering health equity in GRADE guideline development: rating the certainty of synthesized evidence            | GRADE Working Group | The aim of this paper is to “provide guidance to address health equity when rating the certainty in synthesized evidence using the Grading Recommendations Assessment and Development Evidence (GRADE) approach.”                                                                   | Not Specified | Not Specified | Journal Article  |
| <a href="#">Pottie et al. (2017)</a> (37)<br>International            | GRADE Equity guidelines 4: guidance on how to assess and address health equity within the evidence to decision process                       | GRADE Working Group | “The aim of this paper is to provide detailed guidance on how to incorporate health equity within the GRADE (Grading Recommendations Assessment and Development Evidence) evidence to decision process.”                                                                            | Not Specified | Not Specified | Journal Article  |
| <a href="#">Eslava-Schmalbach et al. (2017)</a> (46)<br>International | Considering health equity when moving from evidence-based guideline recommendations to implementation: a case study from an upper-           | GRADE Working Group | The aim of this article is to “provide guidance for consideration of equity during guideline implementation”, illustrated by through a Columbian case study on the development of the clinical practice guideline for pregnancy, childbirth, or puerperium complications.           | Not Specified | Not Specified | Journal Article  |

|                                                                    |                                                                                                                                          |                                                            |                                                                                                                                                                                                                                                                                                                                                                                                                                                                                       |               |               |                   |
|--------------------------------------------------------------------|------------------------------------------------------------------------------------------------------------------------------------------|------------------------------------------------------------|---------------------------------------------------------------------------------------------------------------------------------------------------------------------------------------------------------------------------------------------------------------------------------------------------------------------------------------------------------------------------------------------------------------------------------------------------------------------------------------|---------------|---------------|-------------------|
|                                                                    | middle income country on the GRADE approach                                                                                              |                                                            |                                                                                                                                                                                                                                                                                                                                                                                                                                                                                       |               |               |                   |
| <a href="#">Dewidar et al. (2020)(2)</a><br><b>International</b>   | Over half of the WHO guidelines published from 2014 to 2019 explicitly considered health equity issues: a cross-sectional survey         | World Health Organization (WHO) Guideline Review Committee | The aim of this article is “to evaluate how and to what extent health equity considerations are assessed in World Health Organization (WHO) guidelines.”                                                                                                                                                                                                                                                                                                                              | Not Specified | Not Specified | Journal Article   |
| <a href="#">Rehfuess et al. (2019)(41)</a><br><b>International</b> | The WHO-INTEGRATE evidence to decision framework version 1.0: integrating WHO norms and values and a complexity perspective              | The World Health Organization                              | The aim of the paper is to, “reports on the development of an evidence to decision (EtD) framework that is rooted in WHO norms and values, reflective of the changing global health landscape, and suitable for a range of interventions and complexity features. We also sought to assess the value of this framework to decision-makers at global and national levels, and to facilitate uptake through suggestions on how to prioritize criteria and methods to collect evidence.” | Not Specified | Not Specified | Journal Article   |
| <a href="#">World Health Organization (2014)(42)</a>               | Handbook for Guideline Development Extract Chapter 5: Incorporating Equity, Gender, Human Rights and Social Determinants into guidelines | The World Health Organization                              | The aim of this handbook is to describe how important considerations of equity, human rights principles, gender, and other social determinants of health can be “integrated into each step of the guideline development process and suggest eight entry points for doing so.”                                                                                                                                                                                                         | Not Specified | Not Specified | Report (Handbook) |
| <a href="#">Liburd et al. (2020)(47)</a><br><b>United States</b>   | Addressing health equity in public health practice: frameworks, promising strategies, and measurement considerations                     | The Centers for Disease Control and Prevention (CDC)       | The review “describes the context of health equity and options for integrating health equity into public health practice.” Examples of conceptual frameworks and approaches to assessing progress are discussed.                                                                                                                                                                                                                                                                      | Not Specified | Public Health | Journal Article   |

1  
2  
3  
4  
5  
6  
7  
8  
9  
10  
11  
12  
13  
14  
15  
16  
17  
18  
19  
20  
21  
22  
23  
24  
25  
26  
27  
28  
29  
30  
31  
32  
33  
34  
35  
36  
37  
38  
39  
40  
41  
42  
43  
44  
45  
46  
47

|                                                                                                             |                                                                                                                                                                |                                                                     |                                                                                                                                                                                                                                                                                                                                         |                                      |                                                   |                                  |
|-------------------------------------------------------------------------------------------------------------|----------------------------------------------------------------------------------------------------------------------------------------------------------------|---------------------------------------------------------------------|-----------------------------------------------------------------------------------------------------------------------------------------------------------------------------------------------------------------------------------------------------------------------------------------------------------------------------------------|--------------------------------------|---------------------------------------------------|----------------------------------|
| <p><a href="#">National Health and Medical Research Council (NHMRC) (2018)(39)</a><br/><b>Australia</b></p> | <p>Guidelines for guidelines: equity</p>                                                                                                                       | <p>National Health and Medical Research Council (NHMRC)</p>         | <p>The aim of the Guidelines for Guidelines Handbook is to help NHMRC guideline developers produce high quality guidelines that meet the NHMRC Standards for Guidelines. The equity section of the handbook provides “practical steps that can be taken to consider equity in the development of guidelines.”</p>                       | <p>Not Specified</p>                 | <p>Not Specified</p>                              | <p>Report</p>                    |
| <p><a href="#">National Institute for Health and Care Excellence (NICE) (2018)(33)</a><br/><b>UK</b></p>    | <p>Promoting health and preventing premature mortality in black, Asian and other minority ethnic groups</p>                                                    | <p>The National Institute for Health and Care Excellence (NICE)</p> | <p>NICE quality statements provide guidance and quality standards on specific areas in which people from black, Asian, and other minority ethnic groups experience health inequalities.</p>                                                                                                                                             | <p>Minority Ethnic Groups</p>        | <p>Public Health</p>                              | <p>Report</p>                    |
| <p><a href="#">Berentson-Shaw (2012)(32)</a><br/><b>New Zealand</b></p>                                     | <p>Reducing inequality in health through evidence-based clinical guidance: is it feasible? The New Zealand experience</p>                                      | <p>New Zealand Guidelines Group</p>                                 | <p>The aim of the article is to present “a multifaceted framework, which has been developed in New Zealand to ensure health inequalities experienced by Maori (the indigenous population within New Zealand) are addressed when developing evidence-based guidance.”</p>                                                                | <p>Indigenous population (Maori)</p> | <p>Public Health</p>                              | <p>Journal Article</p>           |
| <p><a href="#">Scottish Intercollegiate Guidelines Network (SIGN) (2019)(40)</a><br/><b>UK</b></p>          | <p>SIGN 50: a guideline developer’s handbook</p>                                                                                                               | <p>Scottish Intercollegiate Guidelines Network (SIGN)</p>           | <p>The main aim of this report is to “provide a reference tool that may be used by individual members of guideline development groups as they work through the development process.” The paper outlines the key elements of the development process common to all SIGN guidelines, including the consideration of issues of equity.</p> | <p>Not Specified</p>                 | <p>Public Health</p>                              | <p>Report (Guideline Manual)</p> |
| <p><a href="#">Prescott et al. (2020)(44)</a><br/><b>Canada</b></p>                                         | <p>Applying a health equity tool to assess a public health nursing guideline for practice in sexually transmitted infection assessment in British Columbia</p> | <p>Equity Lens in Public Health (ELPH) Research Team</p>            | <p>“As part of the Equity Lens in Public Health (ELPH) research project, an assessment of the nursing guideline, Sexually Transmitted Infection (STI) Assessment Decision Support Tool, was undertaken using the Assessing Equity in Clinical Practice Guidelines health equity assessment tool.”</p>                                   | <p>Not Specified</p>                 | <p>Public Health and Community Health Nursing</p> | <p>Journal Article</p>           |



|    |                                                     |                                                                                                                                |                                        |                                                                                                                                                                                                                                                                                                                                                                                      |                                            |                  |                            |
|----|-----------------------------------------------------|--------------------------------------------------------------------------------------------------------------------------------|----------------------------------------|--------------------------------------------------------------------------------------------------------------------------------------------------------------------------------------------------------------------------------------------------------------------------------------------------------------------------------------------------------------------------------------|--------------------------------------------|------------------|----------------------------|
| 1  |                                                     |                                                                                                                                |                                        |                                                                                                                                                                                                                                                                                                                                                                                      |                                            |                  |                            |
| 2  |                                                     |                                                                                                                                |                                        |                                                                                                                                                                                                                                                                                                                                                                                      |                                            |                  |                            |
| 3  | <a href="#">Razon et al. (2020)(45)</a>             | Clinical hypertension guidelines and social determinants of health: a systematic scoping review                                | University of California San Francisco | The aim of the review is to conduct “a scoping review of published guidelines on adult hypertension to explore how existing guidelines direct clinicians to address patients’ social conditions as part of hypertension management.”                                                                                                                                                 | Not Specified                              | Not Specified    | Journal Article (Preprint) |
| 4  |                                                     |                                                                                                                                |                                        |                                                                                                                                                                                                                                                                                                                                                                                      |                                            |                  |                            |
| 5  | <b>United States</b>                                |                                                                                                                                |                                        |                                                                                                                                                                                                                                                                                                                                                                                      |                                            |                  |                            |
| 6  |                                                     |                                                                                                                                |                                        |                                                                                                                                                                                                                                                                                                                                                                                      |                                            |                  |                            |
| 7  |                                                     |                                                                                                                                |                                        |                                                                                                                                                                                                                                                                                                                                                                                      |                                            |                  |                            |
| 8  | <a href="#">Eslava-Schmalbach et al. (2016)(43)</a> | Incorporating equity issues into the development of Colombian clinical practice guidelines: suggestions for the GRADE approach | NA                                     | “To propose how to incorporate equity issues, using the GRADE approach, into the development and implementation of Colombian Clinical Practice Guidelines.”                                                                                                                                                                                                                          | Not Specified                              | Not Specified    | Journal Article            |
| 9  |                                                     |                                                                                                                                |                                        |                                                                                                                                                                                                                                                                                                                                                                                      |                                            |                  |                            |
| 10 | <b>International</b>                                |                                                                                                                                |                                        |                                                                                                                                                                                                                                                                                                                                                                                      |                                            |                  |                            |
| 11 |                                                     |                                                                                                                                |                                        |                                                                                                                                                                                                                                                                                                                                                                                      |                                            |                  |                            |
| 12 |                                                     |                                                                                                                                |                                        |                                                                                                                                                                                                                                                                                                                                                                                      |                                            |                  |                            |
| 13 |                                                     |                                                                                                                                |                                        |                                                                                                                                                                                                                                                                                                                                                                                      |                                            |                  |                            |
| 14 |                                                     |                                                                                                                                |                                        |                                                                                                                                                                                                                                                                                                                                                                                      |                                            |                  |                            |
| 15 | <a href="#">Eslava-Schmalbach et al. (2011)(14)</a> | Incorporating equity into developing and implementing for evidence-based clinical practice guidelines                          | NA                                     | The main purpose “of this analysis is to argue why it is necessary to consider the incorporation of equity considerations in the development and implementation of clinical practice guidelines based on the evidence.”                                                                                                                                                              | Not Specified                              | Not Specified    | Journal Article            |
| 16 |                                                     |                                                                                                                                |                                        |                                                                                                                                                                                                                                                                                                                                                                                      |                                            |                  |                            |
| 17 | <b>Colombia</b>                                     |                                                                                                                                |                                        |                                                                                                                                                                                                                                                                                                                                                                                      |                                            |                  |                            |
| 18 |                                                     |                                                                                                                                |                                        |                                                                                                                                                                                                                                                                                                                                                                                      |                                            |                  |                            |
| 19 | <a href="#">Machluf et al. (2020)(35)</a>           | Gender medicine: lessons from COVID-19 and other medical conditions for designing health policy                                | NA                                     | The paper presents a “literature review on the extent to which research in gender-specific differences in medical conditions has developed over the years and reveals gaps in gender-sensitive awareness between the clinical portrayal and the translation into gender-specific treatment regimens, guidelines and into gender-oriented preventive strategies and health policies.” | Gender differences                         | Not Specified    | Journal Article            |
| 20 |                                                     |                                                                                                                                |                                        |                                                                                                                                                                                                                                                                                                                                                                                      |                                            |                  |                            |
| 21 | <b>Israel</b>                                       |                                                                                                                                |                                        |                                                                                                                                                                                                                                                                                                                                                                                      |                                            |                  |                            |
| 22 |                                                     |                                                                                                                                |                                        |                                                                                                                                                                                                                                                                                                                                                                                      |                                            |                  |                            |
| 23 |                                                     |                                                                                                                                |                                        |                                                                                                                                                                                                                                                                                                                                                                                      |                                            |                  |                            |
| 24 |                                                     |                                                                                                                                |                                        |                                                                                                                                                                                                                                                                                                                                                                                      |                                            |                  |                            |
| 25 | <a href="#">Magwood et al. (2020)(34)</a>           | Determinants of implementation of a clinical practice guideline for homeless health                                            | NA                                     | “The aim of this study is to identify determinants of guideline implementation from the perspective of patients and practitioner stakeholders for a homeless health guideline.”                                                                                                                                                                                                      | Persons who experienced homelessness       | Community Health | Journal Article            |
| 26 |                                                     |                                                                                                                                |                                        |                                                                                                                                                                                                                                                                                                                                                                                      |                                            |                  |                            |
| 27 | <b>Canada</b>                                       |                                                                                                                                |                                        |                                                                                                                                                                                                                                                                                                                                                                                      |                                            |                  |                            |
| 28 |                                                     |                                                                                                                                |                                        |                                                                                                                                                                                                                                                                                                                                                                                      |                                            |                  |                            |
| 29 |                                                     |                                                                                                                                |                                        |                                                                                                                                                                                                                                                                                                                                                                                      |                                            |                  |                            |
| 30 |                                                     |                                                                                                                                |                                        |                                                                                                                                                                                                                                                                                                                                                                                      |                                            |                  |                            |
| 31 |                                                     |                                                                                                                                |                                        |                                                                                                                                                                                                                                                                                                                                                                                      |                                            |                  |                            |
| 32 | <a href="#">Mizen et al. (2012)(19)</a>             | Clinical guidelines contribute to the health inequities experienced by individuals with intellectual disabilities              | NA                                     | “This study uses an equity lens developed by the International Clinical Epidemiology Network (INCLIN) to examine how well clinical guidelines address inequities experienced by individuals with intellectual disabilities.”                                                                                                                                                         | Individuals with intellectual disabilities | Not Specified    | Journal Article            |
| 33 |                                                     |                                                                                                                                |                                        |                                                                                                                                                                                                                                                                                                                                                                                      |                                            |                  |                            |
| 34 | <b>UK</b>                                           |                                                                                                                                |                                        |                                                                                                                                                                                                                                                                                                                                                                                      |                                            |                  |                            |
| 35 |                                                     |                                                                                                                                |                                        |                                                                                                                                                                                                                                                                                                                                                                                      |                                            |                  |                            |
| 36 |                                                     |                                                                                                                                |                                        |                                                                                                                                                                                                                                                                                                                                                                                      |                                            |                  |                            |
| 37 |                                                     |                                                                                                                                |                                        |                                                                                                                                                                                                                                                                                                                                                                                      |                                            |                  |                            |
| 38 |                                                     |                                                                                                                                |                                        |                                                                                                                                                                                                                                                                                                                                                                                      |                                            |                  |                            |
| 39 |                                                     |                                                                                                                                |                                        |                                                                                                                                                                                                                                                                                                                                                                                      |                                            |                  |                            |
| 40 |                                                     |                                                                                                                                |                                        |                                                                                                                                                                                                                                                                                                                                                                                      |                                            |                  |                            |
| 41 |                                                     |                                                                                                                                |                                        |                                                                                                                                                                                                                                                                                                                                                                                      |                                            |                  |                            |
| 42 |                                                     |                                                                                                                                |                                        |                                                                                                                                                                                                                                                                                                                                                                                      |                                            |                  |                            |
| 43 |                                                     |                                                                                                                                |                                        |                                                                                                                                                                                                                                                                                                                                                                                      |                                            |                  |                            |
| 44 |                                                     |                                                                                                                                |                                        |                                                                                                                                                                                                                                                                                                                                                                                      |                                            |                  |                            |
| 45 |                                                     |                                                                                                                                |                                        |                                                                                                                                                                                                                                                                                                                                                                                      |                                            |                  |                            |
| 46 |                                                     |                                                                                                                                |                                        |                                                                                                                                                                                                                                                                                                                                                                                      |                                            |                  |                            |
| 47 |                                                     |                                                                                                                                |                                        |                                                                                                                                                                                                                                                                                                                                                                                      |                                            |                  |                            |

1  
2  
3  
4  
5  
6  
7  
8  
9  
10  
11  
12  
13  
14  
15  
16  
17  
18  
19  
20  
21  
22  
23  
24  
25  
26  
27  
28  
29  
30  
31  
32  
33  
34  
35  
36  
37  
38  
39  
40  
41  
42  
43  
44  
45  
46  
47

|                                       |                                                                             |    |                                                                                                                     |               |               |                 |
|---------------------------------------|-----------------------------------------------------------------------------|----|---------------------------------------------------------------------------------------------------------------------|---------------|---------------|-----------------|
| <a href="#">Shi et al. (2014)(31)</a> | How equity is addressed in clinical practice guidelines: a content analysis | NA | "This study aims to qualitatively synthesize the methods for incorporating equity in clinical practice guidelines." | Not Specified | Not Specified | Journal Article |
|---------------------------------------|-----------------------------------------------------------------------------|----|---------------------------------------------------------------------------------------------------------------------|---------------|---------------|-----------------|

Confidential

**Table 3.** Summary of proposed best practices within each of the four stages of guideline development.

| Stage of Guideline Development                     | Proposed Best Practices Summary                                                                                                                                                                                                                                                                                                                                                                                                                                                                                                                                                                                                                                                                                                                                                                                             | Advantages/ Disadvantages                                                                                                                                                                                                                                                                                                                                                                                                                                                                                                                                                                                                                                                                                                                                                               | Tools Identified                                                                                      |
|----------------------------------------------------|-----------------------------------------------------------------------------------------------------------------------------------------------------------------------------------------------------------------------------------------------------------------------------------------------------------------------------------------------------------------------------------------------------------------------------------------------------------------------------------------------------------------------------------------------------------------------------------------------------------------------------------------------------------------------------------------------------------------------------------------------------------------------------------------------------------------------------|-----------------------------------------------------------------------------------------------------------------------------------------------------------------------------------------------------------------------------------------------------------------------------------------------------------------------------------------------------------------------------------------------------------------------------------------------------------------------------------------------------------------------------------------------------------------------------------------------------------------------------------------------------------------------------------------------------------------------------------------------------------------------------------------|-------------------------------------------------------------------------------------------------------|
| <b>1. Guideline Planning</b>                       |                                                                                                                                                                                                                                                                                                                                                                                                                                                                                                                                                                                                                                                                                                                                                                                                                             |                                                                                                                                                                                                                                                                                                                                                                                                                                                                                                                                                                                                                                                                                                                                                                                         |                                                                                                       |
| a) Priority setting                                | <ul style="list-style-type: none"> <li>-Prioritize key questions that are of the greatest concern and interest to disadvantaged groups(32,38)</li> <li>-PROGRESS-Plus(52) may help developers systematically consider and prioritize populations for whom the health care topic is particularly relevant(31,38,39,43)</li> <li>-Consider dedicating a part of or a whole guideline to the care of disadvantaged groups(38)</li> <li>-Examine any health issue through the lens of equity, human rights, gender, and the influence of social determinants if adapting or adopting an existing guideline(39,42)</li> <li>-Consider other variables that might constitute potential barriers to the desired outcomes, such as legal and policy frameworks that could marginalize or exclude certain populations(42)</li> </ul> | <p><b>Practice:</b> Examine any health issue through the lens of equity, human rights, gender, and the influence of social determinants</p> <p><b>Advantages:</b>(42)</p> <ul style="list-style-type: none"> <li>- May help to better understand the needs and gaps to be addressed and may lead to interventions that are more effective in the longer term and that will evoke a feeling of “ownership” in the targeted group or community</li> </ul>                                                                                                                                                                                                                                                                                                                                 | <ul style="list-style-type: none"> <li>-PROGRESS-Plus(52)</li> <li>-INCLIN equity lens(17)</li> </ul> |
| b) Identifying target audience and topic selection | <ul style="list-style-type: none"> <li>-Disadvantaged groups should be considered when identifying the target audience of a proposed guideline(38)</li> <li>-Planned guidelines should not only focus on the average level of health, but how health is distributed within populations and across groups(42)</li> <li>-Representatives of disadvantaged groups may help to identify target audiences for guidelines(38)</li> </ul>                                                                                                                                                                                                                                                                                                                                                                                          | None identified                                                                                                                                                                                                                                                                                                                                                                                                                                                                                                                                                                                                                                                                                                                                                                         | None identified                                                                                       |
| c) Guideline group membership                      | <ul style="list-style-type: none"> <li>-Include representatives of disadvantaged population groups in the guideline group(19,32,38,46)</li> <li>-Include representatives throughout the entire guideline development process, from selecting topics to implementation(46)</li> <li>-Consider creating an independent subgroup for disadvantaged populations(32)</li> <li>-Recruit and select individuals who understand how to take health equity, human rights, gender, and social determinants into account in efforts to promote better health(38,42)</li> <li>-Ensure that the chair of the voting panel is familiar with health equity(38)</li> </ul>                                                                                                                                                                  | <p><b>Practice:</b> Include representatives of disadvantaged population groups in the guideline group</p> <p><b>Advantages:</b>(32)</p> <ul style="list-style-type: none"> <li>-May lend a clear voice to discussions</li> <li>-Non-resource intensive</li> <li>-Representatives from professional organizations may help bring the weight of their organizations with them</li> </ul> <p><b>Disadvantages:</b>(32)</p> <ul style="list-style-type: none"> <li>-One individual may feel pressure to represent the views of the population</li> <li>-A single voice may not be heard by the group</li> <li>-A health professional from a disadvantaged population may have extra demands, making it difficult for them to commit the time necessary for guideline development</li> </ul> | None identified                                                                                       |

1  
2  
3  
4  
5  
6  
7  
8  
9  
10  
11  
12  
13  
14  
15  
16  
17  
18  
19  
20  
21  
22  
23  
24  
25  
26  
27  
28  
29  
30  
31  
32  
33  
34  
35  
36  
37  
38  
39  
40  
41  
42  
43  
44  
45  
46  
47

|                                   |                                                                                                                                                                                                                                                                                                                                                                                                                                                                                                                                                                                                                                                                                                                                                                                                                                                                                                                                                                                            |                                                                                                                                                                                                                                                                                                                                                                                                                                                                                                                                                                                                                                                                                                                                            |                                                                                                                                                                    |
|-----------------------------------|--------------------------------------------------------------------------------------------------------------------------------------------------------------------------------------------------------------------------------------------------------------------------------------------------------------------------------------------------------------------------------------------------------------------------------------------------------------------------------------------------------------------------------------------------------------------------------------------------------------------------------------------------------------------------------------------------------------------------------------------------------------------------------------------------------------------------------------------------------------------------------------------------------------------------------------------------------------------------------------------|--------------------------------------------------------------------------------------------------------------------------------------------------------------------------------------------------------------------------------------------------------------------------------------------------------------------------------------------------------------------------------------------------------------------------------------------------------------------------------------------------------------------------------------------------------------------------------------------------------------------------------------------------------------------------------------------------------------------------------------------|--------------------------------------------------------------------------------------------------------------------------------------------------------------------|
|                                   | <p>-Give explicit attention to conflicts of interest that can lead to a weakened stance on equity, human rights, gender, and social determinants in the final guideline(42)</p>                                                                                                                                                                                                                                                                                                                                                                                                                                                                                                                                                                                                                                                                                                                                                                                                            | <p>-Only hearing one individual perspective</p> <p><b>Practice:</b> Create an independent subgroup</p> <p><b>Advantages:</b><sup>24</sup></p> <ul style="list-style-type: none"> <li>-Safe and open environment to discuss culturally specific needs related to the guideline</li> <li>-May ensure more equitable participation</li> <li>-Outcomes may be more relevant to the community that they represent</li> </ul> <p><b>Disadvantages:</b>(32)</p> <ul style="list-style-type: none"> <li>-Resource-intensive</li> <li>-No guarantee that subgroup will lead to any additional recommendations</li> <li>-A subgroup separate from the rest of the guideline team may appear exclusionary</li> </ul>                                  |                                                                                                                                                                    |
| <p>d) Stakeholder involvement</p> | <ul style="list-style-type: none"> <li>-Create a plan to recruit, involve and support representatives of disadvantaged populations(14,19,39,40)</li> <li>-Consult experts in engaging representatives and stakeholders(38)</li> <li>-Train stakeholders in the guideline content and development process(38)</li> <li>-Use a structured format to facilitate active participation and feedback(38)</li> <li>-Supply a feedback form when writing to stakeholders(40)</li> </ul>                                                                                                                                                                                                                                                                                                                                                                                                                                                                                                            | <p><b>Practice:</b> Consult disadvantaged populations</p> <p><b>Disadvantages:</b></p> <ul style="list-style-type: none"> <li>-Consultation may become tokenistic if stakeholders are unable to fully participate(38)</li> <li>-Additional resources, planning, and effort may be required(14,39)</li> </ul>                                                                                                                                                                                                                                                                                                                                                                                                                               | <p>None identified</p>                                                                                                                                             |
| <p>e) Scoping questions</p>       | <ul style="list-style-type: none"> <li>-Conduct a literature review to inform the scope of the guideline and question development(32,40,43)</li> <li>-Create a report combining results of formal searches and stakeholder discussions(32)</li> <li>-Develop a logic model to assess relationships between interventions, outcomes, effect modifiers and the social determinants of health(43)</li> <li>-Evaluate health equity at each stage of the PICO framework(38)</li> <li>-Consider population subgroups who are likely to be particularly affected by changes in healthcare related to the guideline topic(38–40)</li> <li>-Create a key question to seek interventions that may reduce disparities in health outcomes(32,43)</li> <li>-Include health equity as an outcome in the PICO questions, analytic framework and SoF table(36)</li> <li>-Address human rights in questions and other issues related to laws, policies, standards, protocols and guidelines(42)</li> </ul> | <p><b>Practice:</b> Conduct a literature review</p> <p><b>Advantages:</b></p> <ul style="list-style-type: none"> <li>-Provides an opportunity to discuss equity related actions regarding previous gaps in evidence(32)</li> </ul> <p><b>Disadvantages:</b></p> <ul style="list-style-type: none"> <li>-Potential difficulty finding data relevant to disadvantaged populations/health equity(32)</li> </ul> <p><b>Practice:</b> Include health equity as an outcome in the PICO questions, analytic framework and SoF table</p> <p><b>Disadvantages:</b></p> <ul style="list-style-type: none"> <li>-May need to exclude other important patient outcomes, as the recommended number of outcomes in a GRADE table is seven(36)</li> </ul> | <ul style="list-style-type: none"> <li>- Kunst and Mackenbach inequality evaluation(53)</li> <li>-Oxman prompts to consider equity in key questions(15)</li> </ul> |

|                                                                      |                                                                                                 |                                                                                                                                                                                                                                                                                                                                                                                                                                                                                                                                                        |                                                                                                                                                                                                                                                                                                                                                        |                                                                                                                                                                                                                           |
|----------------------------------------------------------------------|-------------------------------------------------------------------------------------------------|--------------------------------------------------------------------------------------------------------------------------------------------------------------------------------------------------------------------------------------------------------------------------------------------------------------------------------------------------------------------------------------------------------------------------------------------------------------------------------------------------------------------------------------------------------|--------------------------------------------------------------------------------------------------------------------------------------------------------------------------------------------------------------------------------------------------------------------------------------------------------------------------------------------------------|---------------------------------------------------------------------------------------------------------------------------------------------------------------------------------------------------------------------------|
| 1<br>2<br>3<br>4<br>5<br>6<br>7<br>8<br>9                            | f) Considering the importance of outcomes and interventions, values, preferences, and utilities | -Involve representatives of disadvantaged populations to rate interventions and outcomes(36,38,39)<br>-Search relevant databases for outcomes or interventions rated important by disadvantaged populations(38)                                                                                                                                                                                                                                                                                                                                        | <b>Practice:</b> Involve representatives to rate interventions and outcomes<br><b>Disadvantages:</b><br>-It may be challenging to balance the benefits and harms for recommendations when care provider values differ from stakeholder values(39)                                                                                                      | - Databases for information on patient views:<br>UK DUETs and COMET(38)                                                                                                                                                   |
| 10                                                                   | <b>2. Evidence Review</b>                                                                       |                                                                                                                                                                                                                                                                                                                                                                                                                                                                                                                                                        |                                                                                                                                                                                                                                                                                                                                                        |                                                                                                                                                                                                                           |
| 11<br>12<br>13<br>14<br>15<br>16<br>17<br>18                         | a) Searching for relevant evidence                                                              | -Include non-English studies in the search strategy(38)<br>-Use special filters for guideline questions related to specific geographic locations (e.g., LMIC)(38)<br>-Consider including qualitative and observational studies(32,39)<br>-Consider evidence from fields outside of health (e.g., social science, economics)(38)                                                                                                                                                                                                                        | None identified                                                                                                                                                                                                                                                                                                                                        | -NHMRC Guidelines for Guidelines Handbook(54)<br>-Inforit Indigenous Collection(55)<br>-Aboriginal and Torres Strait Islander Health Bibliography(56)<br>-The Cochrane Health Equity Checklist for Systematic Reviews(57) |
| 19<br>20<br>21<br>22<br>23<br>24<br>25<br>26<br>27<br>28<br>29<br>30 | b) Summarizing the evidence                                                                     | -Include health equity within the PICO question as an outcome in the SoF table(36)<br>-Present the baseline risks and risk differences for each relevant population group with supporting evidence in a SoF table(16)<br>-Assess differences in the magnitude of effect in relative terms between disadvantaged and more advantaged populations(36)<br>-Assess subgroup effects and the credibility of the apparent effect(36)<br>-Lack of evidence surrounding a critical health equity outcome should not be a reason to omit from the SoF table(38) | <b>Practice:</b> Include health equity as an outcome in the SoF table<br><b>Advantages:</b><br>-Easier for guideline panels to find the information on health equity during the EtD process(36)<br><b>Disadvantages:</b><br>-May need to exclude other important patient outcomes, as the recommended number of outcomes in a GRADE table is seven(36) | -Checklist for assessing credibility of subgroup analyses(58)<br>-PRISMA-Equity extension(59)                                                                                                                             |
| 31<br>32<br>33<br>34<br>35<br>36<br>37<br>38                         | c) Quality appraisal                                                                            | -Consider any potential sources of bias that may relate to disadvantaged groups because the quality appraisal of RCTs tend to be generalized across different population groups(32)<br>-Assess indirectness of evidence using the GRADE approach to disadvantaged groups and/or settings(36,37,60)<br>-Provide higher quality ratings for outcomes in the equity analysis under certain conditions, using the GRADE approach(43)                                                                                                                       | <b>Practice:</b> Consider indirectness when evaluating evidence for disadvantages groups using the GRADE approach<br><b>Disadvantages:</b><br>-There may be limitations in the evidence base making it difficult to assess indirectness and rate the overall certainty of evidence(36,38)                                                              | -The Cochrane Health Equity Checklist for Systematic Reviews(57)                                                                                                                                                          |
| 39                                                                   | <b>3. Guideline Development</b>                                                                 |                                                                                                                                                                                                                                                                                                                                                                                                                                                                                                                                                        |                                                                                                                                                                                                                                                                                                                                                        |                                                                                                                                                                                                                           |
| 40<br>41<br>42<br>43<br>44<br>45<br>46<br>47                         | a) Formulating recommendations                                                                  | -Balance the harms and benefits of interventions for disadvantaged populations(31,37)                                                                                                                                                                                                                                                                                                                                                                                                                                                                  | <b>Practice:</b> Develop an equity-strategy to overcome identified barriers                                                                                                                                                                                                                                                                            | -Health Equity Assessment Tool(32)                                                                                                                                                                                        |

1  
2  
3  
4  
5  
6  
7  
8  
9  
10  
11  
12  
13  
14  
15  
16  
17  
18  
19  
20  
21  
22  
23  
24  
25  
26  
27  
28  
29  
30  
31  
32  
33  
34  
35  
36  
37  
38  
39  
40  
41  
42  
43  
44  
45  
46  
47

|                                              |                                                                                                                                                                                                                                                                                                                                                                                                                                                                                                                                                                                                                                                                               |                                                                                                                                                                                                                                                                                                                                                                                                                                                                                                                                                                                                                                                                                                                                                                                                                                                         |                                                                  |
|----------------------------------------------|-------------------------------------------------------------------------------------------------------------------------------------------------------------------------------------------------------------------------------------------------------------------------------------------------------------------------------------------------------------------------------------------------------------------------------------------------------------------------------------------------------------------------------------------------------------------------------------------------------------------------------------------------------------------------------|---------------------------------------------------------------------------------------------------------------------------------------------------------------------------------------------------------------------------------------------------------------------------------------------------------------------------------------------------------------------------------------------------------------------------------------------------------------------------------------------------------------------------------------------------------------------------------------------------------------------------------------------------------------------------------------------------------------------------------------------------------------------------------------------------------------------------------------------------------|------------------------------------------------------------------|
|                                              | <p>-Formulate equitable recommendations by, for example, considering barriers and facilitators of interventions(32,40,44)<br/>         -Develop an “equity-strategy” that aims to overcome identified barriers for disadvantaged populations(46)<br/>         -Consider the six criteria of the WHO-INTEGRATE framework that are relevant to health decision-making and the formulation of recommendations: <i>balance of health benefits and harms, human rights and sociocultural acceptability, health equity, equality and non-discrimination, societal implications, financial and economic considerations, and feasibility and health system considerations</i>(41)</p> | <p><b>Disadvantages:</b><br/>         -There may not be one approach to mitigate harms on health equity due to the heterogeneity of disadvantaged populations(37)</p> <p><b>Practice:</b> Consider the six criteria of the WHO-INTEGRATE framework<br/> <b>Advantages:</b><br/>         - A comprehensive EtD framework that key informants found value in adding the criterion assessing societal implications, as well as human rights and sociocultural acceptability, health equity, equality, and non-discrimination<br/> <b>Disadvantages:</b><br/>         - Key informants expressed concerns with the workload that the use of the framework might add to the guideline development process</p>                                                                                                                                                | <p>- WHO-INTEGRATE framework(41)</p>                             |
| <p>b) Wording of recommendations</p>         | <p>-Recommendations should be worded as clear and actionable statements with respect to equity, human rights, gender and social determinants(38,42)<br/>         -Be specific when defining disadvantaged populations(38)<br/>         -Use language carefully as to not further stigmatize disadvantaged populations(46)</p>                                                                                                                                                                                                                                                                                                                                                 | <p>None identified</p>                                                                                                                                                                                                                                                                                                                                                                                                                                                                                                                                                                                                                                                                                                                                                                                                                                  | <p>None identified</p>                                           |
| <p>c) Assessing equity within guidelines</p> | <p>-To determine how well guidelines address equity, use the INCLEN equity lens(17)<br/>         - Use the EEFA framework when creating/evaluating equity in vaccine guidelines(61)<br/>         - Evaluation and monitoring of the impact of recommendations that potentially affect inequities are also critically important and should be articulated in the guideline document(42)</p>                                                                                                                                                                                                                                                                                    | <p><b>Practice:</b> Use the INCLEN equity lens to assess equity in guidelines<br/> <b>Advantages:</b><br/>         -Transparent and reproducible evaluation(19)<br/>         -Reflects the care provider perspective(44)<br/>         -Broadly applicable to many guidelines(44)<br/>         -Can be used during development or retrospectively(44)<br/> <b>Disadvantages:</b><br/>         -Focuses on biomedical considerations and may miss population-level inequities related to broader sociocultural factors(44)</p> <p><b>Practice:</b> Use the EEFA framework when creating/evaluating equity in vaccine guidelines<br/> <b>Advantages:</b><br/>         -Ensures that recommendations are appropriate and comprehensive.<br/>         -Will help committees to balance the benefits and harms of evidence when creating recommendations.</p> | <p>-INCLEN equity lens(17)<br/>         - EEFA Framework(61)</p> |

|                                                 |                                                                                                                                                                                                                                                                                                                                                                                                                                                                                                                                         |                 |                 |
|-------------------------------------------------|-----------------------------------------------------------------------------------------------------------------------------------------------------------------------------------------------------------------------------------------------------------------------------------------------------------------------------------------------------------------------------------------------------------------------------------------------------------------------------------------------------------------------------------------|-----------------|-----------------|
| d) Review and reporting                         | -Develop methods to ensure the rigorous and systematic reporting of evidence related to equity-based recommendations(2)                                                                                                                                                                                                                                                                                                                                                                                                                 | None identified | None identified |
| <b>4. Dissemination</b>                         |                                                                                                                                                                                                                                                                                                                                                                                                                                                                                                                                         |                 |                 |
| a) Monitoring implementation and evaluating use | -Monitor the guideline impact and uptake in subgroups(31,38,43,46)<br>-Decide on implementation strategies and indicators prior to guideline publication(43)<br>-Use indicators that are stratified by equity factors to monitor disparities(46) or measure implementation within subgroups(38)<br>-Obtain surveillance data to monitor relevant health outcomes or indicators <sup>41</sup><br>-Consult relevant community advisory committees and stakeholders for disadvantaged populations to obtain implementation feedback(44,47) | None identified | -GRADE-FACE(34) |
| b) Updating                                     | -Consider the impact of the guideline recommendations on disadvantaged populations to help inform decisions on guideline revisions(40)                                                                                                                                                                                                                                                                                                                                                                                                  | None identified | None identified |

DUET: Database of Uncertainties about the Effects of Treatments; COMET: Core Outcome Measures in Effectiveness Trials; EEFA: Ethics, Equity, Feasibility, Acceptability; EtD: Evidence to decision; GRADE-FACE: GRADE Feasibility, Acceptability, Cost, and Equity Survey; INCLIN: International Clinical Epidemiology Network; LMIC: low- and middle-income countries; NHMRC: National Health and Medical Research Council; PICO: Population, Intervention, Comparator, Outcomes; PROGRESS: Place of residence, Race/ethnicity/culture/language, Occupation, Gender/sex, Religion, Education, Socioeconomic status, and Social capital; SoF: Summary of Findings

## References

1. World Health Organization. Constitution of the World Health Organization. In: Forty-fifth edition. WHO; Geneva, Switzerland; 2006. Available from: [https://www.who.int/governance/eb/who\\_constitution\\_en.pdf](https://www.who.int/governance/eb/who_constitution_en.pdf)
2. Dewidar O, Tsang P, León-García M, Mathew C, Antequera A, Baldeh T, et al. Over half of the WHO guidelines published from 2014 to 2019 explicitly considered health equity issues: a cross-sectional survey. *J Clin Epidemiol*. 2020 Nov;127:125–33.
3. Graham H. Social Determinants and Their Unequal Distribution: Clarifying Policy Understandings. *Milbank Q*. 2004 Mar;82(1):101–24.
4. Working Group for Monitoring Action on the Social Determinants of Health. Towards a global monitoring system for implementing the Rio Political Declaration on Social Determinants of Health: developing a core set of indicators for government action on the social determinants of health to improve health equity. *Int J Equity Health*. 2018 Dec;17(1):136.
5. Whitehead M. The Concepts and Principles of Equity and Health. *Int J Health Serv*. 1992;22(3):429–45.
6. World Health Organization. WHO handbook for guideline development. 2014.
7. Baciu A. The Root Causes of Health Inequity [Internet]. Negussie Y, Geller A, Weinstein JN, editors. *Communities in Action: Pathways to Health Equity*. National Academies Press (US); 2017 [cited 2020 Nov 2]. Available from: <https://www.ncbi.nlm.nih.gov/books/NBK425845/>
8. Braveman P, Gottlieb L. The Social Determinants of Health: It's Time to Consider the Causes of the Causes. *Public Health Rep*. 2014;129(Suppl 2):19–31.
9. Riley WJ. Health Disparities: Gaps in access, quality and affordability of medical care. *Trans Am Clin Climatol Assoc*. 2012;123:8.
10. Andermann A. Taking action on the social determinants of health in clinical practice: a framework for health professionals. *Can Med Assoc J* [Internet]. 2016 Dec 6 [cited 2020 Nov 2];188(17–18). Available from: <http://www.cmaj.ca/lookup/doi/10.1503/cmaj.160177>
11. Braveman PA, Kumanyika S, Fielding J, Laveist T, Borrell LN, Manderscheid R, et al. Health disparities and health equity: the issue is justice. *Am J Public Health*. 2011/05/06 ed. 2011 Dec;101 Suppl 1(Suppl 1):S149–55.
12. Daghofer D, Edwards P. *Toward Health Equity: A Comparative Analysis and Framework for Action*. Public Health Agency of Canada, Strategic Initiatives and Innovations Directorate; 2009.
13. Health Quality Ontario (HQO). *Health Quality Ontario's Health Equity Plan* [Internet]. Toronto, ON; [cited 2020 Dec 1]. Available from: <https://www.hqontario.ca/What-is-Health-Quality/Health-Equity-and-Quality/Our-Health-Equity-Plan>



14. Eslava-Schmalbach J, Sandoval-Vargas G, Mosquera P. Incorporating equity into developing and implementing for evidence-based clinical practice guidelines. *Rev Salud Pública*. 2011 Apr;13(2):339–51.
15. Oxman AD, Schünemann HJ, Fretheim A. Improving the use of research evidence in guideline development: 12. Incorporating considerations of equity. *Health Res Policy Syst*. 2006 Dec;4(1):24.
16. Welch VA, Akl EA, Guyatt G, Pottie K, Eslava-Schmalbach J, Ansari MT, et al. GRADE equity guidelines 1: considering health equity in GRADE guideline development: introduction and rationale. *J Clin Epidemiol*. 2017 Oct;90:59–67.
17. Dans AM, Dans L, Oxman AD, Robinson V, Acuin J, Tugwell P, et al. Assessing equity in clinical practice guidelines. *J Clin Epidemiol*. 2007 Jun;60(6):540–6.
18. Lorenc T, Petticrew M, Welch V, Tugwell P. What types of interventions generate inequalities? Evidence from systematic reviews: Table 1. *J Epidemiol Community Health*. 2013 Feb;67(2):190–3.
19. Mizen LA, Macfie ML, Findlay L, Cooper SA, Melville CA. Clinical guidelines contribute to the health inequities experienced by individuals with intellectual disabilities. *Implement Sci*. 2012 Dec;7(1):42.
20. Aldrich R, Lynn Kemp, Jenny Stewart Williams, Elizabeth Harris, Sarah Simpson, Amanda Wilson, et al. Using socioeconomic evidence in clinical practice guidelines. *BMJ*. 2003 Nov 29;327(7426):1283–5.
21. Florez ID, Brouwers MC, Kerkvliet K, Spithoff K, Alonso-Coello P, Burgers J, et al. Assessment of the quality of recommendations from 161 clinical practice guidelines using the Appraisal of Guidelines for Research and Evaluation–Recommendations Excellence (AGREE-REX) instrument shows there is room for improvement. *Implement Sci*. 2020 Sep 18;15(1):79.
22. Levac D, Colquhoun H, O'Brien KK. Scoping studies: advancing the methodology. *Implement Sci*. 2010;5(1):69.
23. Arksey H, O'Malley L. Scoping studies: towards a methodological framework. *Int J Soc Res Methodol*. 2005;8(1):19–32.
24. Peters M, Godfrey C, McInerney P, Soares C, Khalil H, Parker D. The Joanna Briggs Institute reviewers' manual 2015: methodology for JBI scoping reviews. 2015;
25. Peters MD, Marnie C, Tricco AC, Pollock D, Munn Z, Alexander L, et al. Updated methodological guidance for the conduct of scoping reviews. *JBI Evid Synth*. 2020;18(10):2119–26.
26. McGowan J, Sampson M, Salzwedel DM, Cogo E, Foerster V, Lefebvre C. PRESS peer review of electronic search strategies: 2015 guideline statement. *J Clin Epidemiol*. 2016;75:40–6.

- 1
- 2
- 3
- 4 27. Canadian Agency for Drugs and Technologies in Health (CADTH). Grey Matters: a
- 5 practical tool for searching health-related grey literature [Internet]. 2015. Available from:
- 6 [https://www.cadth.ca/sites/default/files/is/Grey%20Matters\\_EN-2019.doc](https://www.cadth.ca/sites/default/files/is/Grey%20Matters_EN-2019.doc)
- 7
- 8 28. Covidence systematic review software [Internet]. Veritas Health Innovation, Melbourne,
- 9 Australia.; Available from: Available at [www.covidence.org](http://www.covidence.org)
- 10
- 11 29. QSR International Pty Ltd. NVivo [Internet]. 2020. Available from:
- 12 <https://www.qsrinternational.com/nvivo-qualitative-data-analysis-software/home>
- 13
- 14 30. Schunemann HJ, Wiercioch W, Etzeandía I, Falavigna M, Santesso N, Mustafa R, et al.
- 15 Guidelines 2.0: systematic development of a comprehensive checklist for a successful
- 16 guideline enterprise. *Can Med Assoc J*. 2014 Feb 18;186(3):E123–42.
- 17
- 18 31. Shi C, Tian J, Wang Q, Petkovic J, Ren D, Yang K, et al. How equity is addressed in
- 19 clinical practice guidelines: a content analysis. *BMJ Open*. 2014 Dec;4(12):e005660.
- 20
- 21 32. Berentson-Shaw J. Reducing inequality in health through evidence-based clinical
- 22 guidance: is it feasible? The New Zealand experience. *Int J Evid Based Healthc*. 2012
- 23 Jun;10(2):146–53.
- 24
- 25 33. National Institute for Health and Care Excellence (NICE). Promoting health and preventing
- 26 premature mortality in black, Asian and other minority ethnic groups [Internet]. 2018.
- 27 Available from: [www.nice.org.uk/guidance/qs167](http://www.nice.org.uk/guidance/qs167)
- 28
- 29 34. Magwood O, Hanemaayer A, Saad A, Salvalaggio G, Bloch G, Moledina A, et al.
- 30 Determinants of Implementation of a Clinical Practice Guideline for Homeless Health. *Int J*
- 31 *Environ Res Public Health* [Internet]. 2020;17(7938). Available from:
- 32 [https://ovidsp.ovid.com/ovidweb.cgi?T=JS&CSC=Y&NEWS=N&PAGE=fulltext&D=pem&A](https://ovidsp.ovid.com/ovidweb.cgi?T=JS&CSC=Y&NEWS=N&PAGE=fulltext&D=pem&AN=33138054https://ocul-)
- 33 [N=33138054https://ocul-](https://ocul-)
- 34 [uo.primo.exlibrisgroup.com/discovery/openurl?institution=01OCUL\\_UO&vid=01OCUL\\_UO:](https://ocul-)
- 35 [UO\\_DEFAULT&?sid=OVID:medline&id=pmid:33138054&id=doi:10.3390%2Fijerph172179](https://ocul-)
- 36 [33138054https://ocul-](https://ocul-)
- 37
- 38 35. Machluf Y, Chaïter Y, Tal O. Gender medicine: Lessons from COVID-19 and other medical
- 39 conditions for designing health policy. *World J Clin Cases*. 2020 Sep;8(17):3645–68.
- 40
- 41 36. Welch VA, Akl EA, Pottie K, Ansari MT, Briel M, Christensen R, et al. GRADE equity
- 42 guidelines 3: considering health equity in GRADE guideline development: rating the
- 43 certainty of synthesized evidence. *J Clin Epidemiol*. 2017;90:76–83.
- 44
- 45 37. Pottie K, Welch V, Morton R, Akl EA, Eslava-Schmalbach JH, Katikireddi V, et al. GRADE
- 46 equity guidelines 4: considering health equity in GRADE guideline development: evidence
- 47 to decision process. *J Clin Epidemiol*. 2017 Oct;90:84–91.
- 48
- 49 38. Akl EA, Welch V, Pottie K, Eslava-Schmalbach J, Darzi A, Sola I, et al. GRADE equity
- 50 guidelines 2: considering health equity in GRADE guideline development: equity extension
- 51 of the guideline development checklist. *J Clin Epidemiol*. 2017 Oct;90:68–75.
- 52
- 53 39. National Health and Medical Research Council (NHMRC). Guidelines for Guidelines:
- 54 Equity [Internet]. 2018. Available from:
- 55 <https://www.nhmrc.gov.au/guidelinesforguidelines/plan/equity>
- 56
- 57
- 58
- 59
- 60

- 1
  - 2
  - 3
  - 4
  - 5
  - 6
  - 7
  - 8
  - 9
  - 10
  - 11
  - 12
  - 13
  - 14
  - 15
  - 16
  - 17
  - 18
  - 19
  - 20
  - 21
  - 22
  - 23
  - 24
  - 25
  - 26
  - 27
  - 28
  - 29
  - 30
  - 31
  - 32
  - 33
  - 34
  - 35
  - 36
  - 37
  - 38
  - 39
  - 40
  - 41
  - 42
  - 43
  - 44
  - 45
  - 46
  - 47
  - 48
  - 49
  - 50
  - 51
  - 52
  - 53
  - 54
  - 55
  - 56
  - 57
  - 58
  - 59
  - 60
40. Scottish Intercollegiate Guidelines Network (SIGN). Sign 50: a guideline developer's handbook. [Internet]. Edinburgh: NHS Scotland; 2019. Available from: <http://www.sign.ac.uk>
41. Rehfuess EA, Stratil JM, Scheel IB, Portela A, Norris SL, Baltussen R. The WHO-INTEGRATE evidence to decision framework version 1.0: integrating WHO norms and values and a complexity perspective. *BMJ Glob Health*. 2019 Jan;4(Suppl 1):e000844.
42. World Health Organization. Handbook for Guideline Development: Chapter 5 Incorporating Equity, Gender, Human Rights and Social Determinants into guidelines [Internet]. 2014 [cited 2022 Mar 18]. Available from: <https://www.who.int/gender-equity-rights/understanding/grc-chapter5.pdf>
43. Eslava-Schmalbach JH, Welch VA, Tugwell P, Amaya AC, Gaitan H, Mosquera P, et al. Incorporating equity issues into the development of Colombian clinical practice guidelines: suggestions for the GRADE approach. *Rev Salud Publica*. 2016 Feb;18(1):72–81.
44. Prescott C, Sana Z, Shahram, Gina Ogilvie, Noorjean Hassam, Alison Swalwell Franks, Bernie Pauly. Applying a health equity tool to assess a public health nursing guideline for practice in sexually transmitted infection assessment in British Columbia. *Can J Public Health*. 2020;111:610–6.
45. Razon N, Hessler-Jones D, Bibbins-Domingo K, Gottlieb L. Clinical Hypertension Guidelines and Social Determinants of Health: A Systematic Scoping Review [Internet]. In Review; 2020 Sep [cited 2020 Dec 1]. Available from: <https://www.researchsquare.com/article/rs-59491/v1>
46. Eslava-Schmalbach J, Mosquera P, Alzate JP, Pottie K, Welch V, Akl EA, et al. Considering health equity when moving from evidence-based guideline recommendations to implementation: a case study from an uppermiddle income country on the GRADE approach. *Health Policy Plan*. 2017 Dec;32(10):1492.
47. Liburd LC, Hall JE, Mpofu JJ, Williams SM, Bouye K, Penman-Aguilar A. Addressing Health Equity in Public Health Practice: Frameworks, Promising Strategies, and Measurement Considerations. *Annu Rev Public Health*. 2020 Apr 2;41:417–32.
48. Acosta N, Pollard J, Mosquera P, Reveiz L. The concept of equity when developing clinical practice guidelines. *Rev Salud Publica*. 2011 Apr;13(2):327–38.
49. Elder K, Turner KA, Cosgrove L, Lexchin J, Shnier A, Moore A, et al. Reporting of financial conflicts of interest by Canadian clinical practice guideline producers: a descriptive study. *CMAJ Can Med Assoc J*. 2020 Jun;192(23):E617–25.
50. Cerdeña JP, Plaisime MV, Tsai J. From race-based to race-conscious medicine: how anti-racist uprisings call us to act. *The Lancet*. 2020 Oct;396(10257):1125–8.
51. Vyas DA, Eisenstein LG, Jones DS. Hidden in Plain Sight — Reconsidering the Use of Race Correction in Clinical Algorithms. *N Engl J Med*. 2020;383:874–82.
52. O'Neill J, Hilary Tabish, Vivian Welch, Petticrew M, Kevin Pottie, Mike Clarke, et al. Applying an equity lens to interventions: using PROGRESS ensures consideration of

- 1  
2  
3 socially stratifying factors to illuminate inequities in health. *J Clin Epidemiol*. 2014;67:56–  
4 64.  
5  
6 53. Kunst, A. E., Mackenbach, J. P. *Measuring Socio-economic Inequalities in Health*.  
7 Copenhagen: World Health Organization; 1994.  
8  
9 54. NHMRC. *Guidelines for Guidelines Handbook* [Internet]. [cited 2021 Feb 3]. Available from:  
10 <https://www.nhmrc.gov.au/guidelinesforguidelines>  
11  
12 55. Informit. *Indigenous Collection* [Internet]. 2021 [cited 2021 Feb 3]. Available from:  
13 <https://search.informit.org/topic/rmit-products/IELIND>  
14  
15 56. Australian Indigenous HealthInfoNet. *Promote and practice - Publications* [Internet]. [cited  
16 2021 Feb 3]. Available from: <https://healthinfonet.ecu.edu.au/key-resources/publications/>  
17  
18 57. Tugwell P, Petticrew M, Kristjansson E, Welch V, Ueffing E, Waters E, et al. Assessing  
19 equity in systematic reviews: realising the recommendations of the Commission on Social  
20 Determinants of Health. *BMJ*. 2010 Sep 13;341(sep13 1):c4739–c4739.  
21  
22 58. Sun X, Briel M, Walter SD, Guyatt GH. Is a subgroup effect believable? Updating criteria to  
23 evaluate the credibility of subgroup analyses. *BMJ*. 2010 Mar 30;340:c117.  
24  
25 59. Welch V, Petticrew M, Petkovic J, Moher D, Waters E, White H, et al. Extending the  
26 PRISMA statement to equity-focused systematic reviews (PRISMA-E 2012): explanation  
27 and elaboration. *J Clin Epidemiol*. 2016 Feb;70:68–89.  
28  
29 60. Guyatt GH, Oxman AD, Kunz R, Woodcock J, Brozek J, Helfand M, et al. GRADE  
30 guidelines: 8. Rating the quality of evidence—indirectness. *J Clin Epidemiol*. 2011 Dec  
31 1;64(12):1303–10.  
32  
33 61. Ismail SJ, Hardy K, Tunis MC, Young K, Sicard N, Quach C. A framework for the  
34 systematic consideration of ethics, equity, feasibility, and acceptability in vaccine program  
35 recommendations. *Vaccine*. 2020 Aug 10;38(36):5861–76.  
36  
37  
38  
39  
40  
41  
42  
43  
44  
45  
46  
47  
48  
49  
50  
51  
52  
53  
54  
55  
56  
57  
58  
59  
60

## Appendix A. Completed PRESS

### PRESS Guideline 2015— Search Submission & Peer Review Assessment

Reference: McGowan J, Sampson M, Salzwedel DM, Cogo E, Foerster V, Lefebvre C. PRESS Peer Review of Electronic Search Strategies: 2015 guideline statement. *J Clin Epidemiol* 2016;75:40-6. Available: [http://www.jclinepi.com/article/S0895-4356\(16\)00058-5/pdf](http://www.jclinepi.com/article/S0895-4356(16)00058-5/pdf).

#### Search submission: This section to be filled in by the searcher

Searcher: Becky Skidmore

Email: [bskidmore@rogers.com](mailto:bskidmore@rogers.com)

Date submitted: 20 Nov 2020

Date requested by: 23 Nov 2020 early AM

#### 1. Systematic Review Title

Environmental scan of best practices for incorporating health equity in guidelines

#### 2. This search strategy is ...

|   |                                                                                                                                                                                                                   |
|---|-------------------------------------------------------------------------------------------------------------------------------------------------------------------------------------------------------------------|
| x | My PRIMARY (core) database strategy — First time submitting a strategy for search question and database                                                                                                           |
|   | My PRIMARY (core) strategy — Follow-up review NOT the first time submitting a strategy for search question and database. If this is a response to peer review, itemize the changes made to the review suggestions |
|   | SECONDARY search strategy— First time submitting a strategy for search question and database                                                                                                                      |
|   | SECONDARY search strategy — NOT the first time submitting a strategy for search question and database. If this is a response to peer review, itemize the changes made to the review suggestions                   |

#### 3. Database (e.g., MEDLINE, CINAHL)

[mandatory]

MEDLINE

#### 4. Interface (e.g., Ovid, EbscoHost...)

[mandatory]

Ovid

#### 5. Research Question (Describe the purpose of the search)

[mandatory]

The environmental scan will involve a literature search and searches for processes used by other organizations internationally.

The purpose of this objective is summarized best practices that have been described in (1) the peer reviewed literature, (2) procedures or processes from other bodies that create guidelines, and (3) the grey literature including government reports. We will summarize the findings in a narrative format and include helpful lists or figures.

**6. PICO Format** Outline the PICOs for your question — i.e., Patient, Intervention, Comparison, Outcome, and Study Design — as applicable

|                         |                     |
|-------------------------|---------------------|
| <b>P</b>                | Guideline Processes |
| <b>I /<br/>Exposure</b> | Health Equity       |
| <b>C</b>                |                     |
| <b>O</b>                |                     |
| <b>S</b>                |                     |

**7. Inclusion Criteria** (List criteria such as age groups, study designs, etc., to be included) *[optional]*

**9. Exclusion Criteria** (List criteria such as study designs, date limits, etc., to be excluded) **[optional]**

Exclude pre 2010

**10. Was a search filter applied?** No

**If YES, which one(s) (e.g., Cochrane RCT filter, PubMed Clinical Queries filter)? Provide the source if this is a published filter.** *[mandatory if YES to previous question — textbox]*

**11. Notes or comments you feel would be useful for the peer reviewer** *[optional]*

The provision of high-quality primary care is known to address inequities. We have recently recognized the importance of advancing health equity and agreed to focus efforts on health equity moving forward. This three-part proposal is to inform future work that will promote health equity.

This search is intended to be focussed for higher relevancy. The current search catches most of the records identified by the client as relevant to this topic.

**12. Please copy and paste your search strategy here, exactly as run, including the number of hits per line.** **[mandatory]**

Database: Ovid MEDLINE(R) ALL <1946 to October 09, 2020>

Search Strategy:

- ```

1 ((guideline? or clinical practice guideline? or CPG or CPGs or evidence-based guideline?) adj5 (deprivation* or
2 deprive or deprived or deprives or depriving or disadvantag* or disparit* or equalit* or equit* or fair or fairness*
3 or inequit* or impoverish* or inequalit* or insecurit* or marginal* or poverty or underserv* or unfair* or
4 vulnerab*)).tw,kf. (875)
5
6 2 ((guideline? or clinical practice guideline? or CPG or CPGs or evidence-based guideline? or guidance? or
7 standards or consensus* or recommendat* or practice parameter* or position statement* or policy statement*)
8 and (deprivation* or deprive or deprived or deprives or depriving or disadvantag* or disparit* or equalit* or equit*
9 or fair or fairness* or inequit* or impoverish* or inequalit* or insecurit* or marginal* or poverty or underserv* or
10 unfair* or vulnerab*)).ti,kf. (1043)
11
12 3 exp Guidelines as Topic/ (163297)

```

- 4 ((guideline? or clinical practice guideline? or CPG or CPGs or evidence-based guideline?) adj5 (develop\* or establish\* or ethic\* or framework? or implement\* or method\* or organis\* or organiz\* or process\* or strateg\*)).tw,kf. (71538)
- 5 ((guideline? or clinical practice guideline? or CPG or CPGs or evidence-based guideline? or guidance? or standards or consensus\* or recommendat\* or practice parameter\* or position statement\* or policy statement\*) and (develop\* or establish\* or ethic\* or framework? or implement\* or method\* or organis\* or organiz\* or process\* or strateg\*)).ti,kf. (28149)
- 6 1 or 2 [GUIDELINE - EQUITY] (1739)
- 7 or/3-5 [GUIDELINES AS TOPIC/PROCESSES, ETC.] (232922)
- 8 6 and 7 [GUIDELINE - EQUITY - PROCESSES, ETC.] (691)
- 9 exp Animals/ not Humans/ (4742879)
- 10 8 not 9 [ANIMAL-ONLY REMOVED] (686)
- 11 (comment or editorial or news or newspaper article).pt. (1477478)
- 12 (letter not (letter not randomized controlled trial)).pt. (5309)
- 13 10 not (11 not 12) [OPINION PIECES REMOVED] (664)
- 14 limit 13 to yr="2010-current" (497)

**Peer review assessment: this section to be filled in by the reviewer**

|                            |                                                                         |                             |
|----------------------------|-------------------------------------------------------------------------|-----------------------------|
| Reviewer: Kaitryn Campbell | Email: <a href="mailto:kcamlolo668@gmail.com">kcamlolo668@gmail.com</a> | Date completed: 21 Nov 2020 |
|----------------------------|-------------------------------------------------------------------------|-----------------------------|

Do you wish to be acknowledged? (If yes, the review team will be advised to add an acknowledgement to any publications related to this work). No – unless your organization requires it  
 The suggested acknowledgement is “We thank Xxxxx Yyyyyy, MLIS, AHIP (xxxxx Health Sciences Library, University of xxxxxx) for peer review of the MEDLINE search strategy.” [please edit to indicate your name, postnomials and institutional affiliation as you would like them presented].

**1. TRANSLATION**

|                             |   |
|-----------------------------|---|
| A ---No revisions           | X |
| B --- Revision(s) suggested |   |
| C --- Revision(s) required  |   |

If “B” or “C,” please provide an explanation or example:

**2. BOOLEAN AND PROXIMITY OPERATORS**

|                             |   |
|-----------------------------|---|
| A ---No revisions           | X |
| B --- Revision(s) suggested |   |
| C --- Revision(s) required  |   |

If “B” or “C,” please provide an explanation or example:

**3. SUBJECT HEADINGS**

|                             |   |
|-----------------------------|---|
| A ---No revisions           | X |
| B --- Revision(s) suggested |   |
| C --- Revision(s) required  |   |

If “B” or “C,” please provide an explanation or example:

**4. TEXT WORD SEARCHING**

|                            |   |
|----------------------------|---|
| A ---No revisions          | X |
| B --- Revision(s)suggested |   |
| C --- Revision(s) required |   |

If "B" or "C," please provide an explanation or example:

**5. SPELLING, SYNTAX, AND LINE NUMBERS**

|                            |   |
|----------------------------|---|
| A ---No revisions          | X |
| B --- Revision(s)suggested |   |
| C --- Revision(s) required |   |

If "B" or "C," please provide an explanation or example:

**6. LIMITS AND FILTERS**

|                             |   |
|-----------------------------|---|
| A ---No revisions           | X |
| B --- Revision(s) suggested |   |
| C --- Revision(s) required  |   |

If "B" or "C," please provide an explanation or example:

**OVERALL EVALUATION** (Note: If one or more "revision required" is noted above, the response below must be "revisions required".)

|                             |   |
|-----------------------------|---|
| A ---No revisions           | X |
| B --- Revision(s) suggested |   |
| C --- Revision(s) required  |   |

Additional comments:

No errors or omissions, and no suggestions. Looks solid.



## Appendix B. Electronic search strategies

Health Equity – Guideline Processes

Final Strategies

2020 Nov 23

Ovid Multifile

Database: Embase Classic+Embase <1947 to 2020 November 20> , Ovid MEDLINE(R) ALL <1946 to November 20, 2020>

Search Strategy:

1 ((guideline? or clinical practice guideline? or CPG or CPGs or evidence-based guideline?) adj5 (deprivation\* or deprive or deprived or deprives or depriving or disadvantage\* or disparit\* or equalit\* or equit\* or fair or fairness\* or inequit\* or impoverish\* or inequalit\* or insecurit\* or marginal\* or poverty or underserv\* or unfair\* or vulnerab\*)).tw,kf. (1986)

2 ((guideline? or clinical practice guideline? or CPG or CPGs or evidence-based guideline? or guidance? or standards or consensus\* or recommendat\* or practice parameter\* or position statement\* or policy statement\*) and (deprivation\* or deprive or deprived or deprives or depriving or disadvantage\* or disparit\* or equalit\* or equit\* or fair or fairness\* or inequit\* or impoverish\* or inequalit\* or insecurit\* or marginal\* or poverty or underserv\* or unfair\* or vulnerab\*)).ti,kf. (1708)

3 exp Guidelines as Topic/ (737428)

4 ((guideline? or clinical practice guideline? or CPG or CPGs or evidence-based guideline?) adj5 (develop\* or establish\* or ethic\* or framework? or implement\* or method\* or organis\* or organiz\* or process\* or strateg\*)).tw,kf. (172902)

5 ((guideline? or clinical practice guideline? or CPG or CPGs or evidence-based guideline? or guidance? or standards or consensus\* or recommendat\* or practice parameter\* or position statement\* or policy statement\*) and (develop\* or establish\* or ethic\* or framework? or implement\* or method\* or organis\* or organiz\* or process\* or strateg\*)).ti,kf. (53504)

6 1 or 2 [GUIDELINE - EQUITY] (3344)

7 or/3-5 [GUIDELINES AS TOPIC/PROCESSES, ETC.] (868820)

8 6 and 7 [GUIDELINE - EQUITY - PROCESSES, ETC.] (1580)

9 exp Animals/ not Humans/ (18432863)

10 8 not 9 [ANIMAL-ONLY REMOVED] (1151)

11 (comment or editorial or news or newspaper article).pt. (2137328)

12 (letter not (letter not randomized controlled trial)).pt. (5352)

13 10 not (11 not 12) [OPINION PIECES REMOVED] (1125)

14 limit 13 to yr="2010-current" (800)

15 14 use medall [MEDLINE RECORDS] (475)

16 ((guideline? or clinical practice guideline? or CPG or CPGs or evidence-based guideline?) adj5 (deprivation\* or deprive or deprived or deprives or depriving or disadvantage\* or disparit\* or equalit\* or equit\* or fair or fairness\* or inequit\* or impoverish\* or inequalit\* or insecurit\* or marginal\* or poverty or underserv\* or unfair\* or vulnerab\*)).tw,kw. (2012)

17 ((guideline? or clinical practice guideline? or CPG or CPGs or evidence-based guideline? or guidance? or standards or consensus\* or recommendat\* or practice parameter\* or position statement\* or policy statement\*) and (deprivation\* or deprive or deprived or deprives or depriving or disadvantage\* or disparit\* or equalit\* or equit\* or fair or fairness\* or inequit\* or impoverish\* or inequalit\* or insecurit\* or marginal\* or poverty or underserv\* or unfair\* or vulnerab\*)).ti,kw. (2031)

18 ((guideline? or clinical practice guideline? or CPG or CPGs or evidence-based guideline?) adj5 (develop\* or establish\* or ethic\* or framework? or implement\* or method\* or organis\* or organiz\* or process\* or strateg\*)).tw,kw. (173345)

19 ((guideline? or clinical practice guideline? or CPG or CPGs or evidence-based guideline? or guidance? or standards or consensus\* or recommendat\* or practice parameter\* or position statement\* or policy statement\*) and (develop\* or establish\* or ethic\* or framework? or implement\* or method\* or organis\* or organiz\* or process\* or strateg\*)).ti,kw. (59911)

20 16 or 17 [GUIDELINE - EQUITY] (3655)

21 18 or 19 [GUIDELINES AS TOPIC/PROCESSES, ETC.] (211483)

22 20 and 21 [GUIDELINE - EQUITY - PROCESSES, ETC.] (927)

23 exp animal/ or exp animal experimentation/ or exp animal model/ or exp animal experiment/ or nonhuman/ or exp vertebrate/ (54107096)

24 exp human/ or exp human experimentation/ or exp human experiment/ (41925790)

25 23 not 24 (12183115)

26 22 not 25 [ANIMAL-ONLY REMOVED] (914)

27 editorial.pt. (1224913)  
 28 letter.pt. not (letter.pt. not randomized controlled trial/) (10844)  
 29 26 not (27 not 28) [OPINION PIECES REMOVED] (908)  
 30 limit 29 to yr="2010-current" (687) [TOTAL UNIQUE RECORDS]  
 31 30 use emczd [EMBASE RECORDS] (421)  
 32 15 or 31 [BOTH DATABASES] (896)  
 33 remove duplicates from 32 (621) [TOTAL UNIQUE RECORDS]  
 34 33 use medall [MEDLINE UNIQUE RECORDS] (474)  
 35 33 use emczd [EMBASE UNIQUE RECORDS] (147)

\*\*\*\*\*

CINAHL

| #   | Query                  | Limiters/Expanders                                                                                                                                                   | Last Run Via                                                                               | Results |
|-----|------------------------|----------------------------------------------------------------------------------------------------------------------------------------------------------------------|--------------------------------------------------------------------------------------------|---------|
| S11 | S8 NOT S9              | Limiters - Published Date: 20100101-20201231; Exclude MEDLINE records<br>Expanders - Apply related words; Apply equivalent subjects<br>Search modes - Boolean/Phrase | Interface - EBSCOhost Research Databases Search Screen - Advanced Search Database - CINAHL | 560     |
| S10 | S8 NOT S9              | Limiters - Published Date: 20100101-20201231<br>Expanders - Apply related words; Apply equivalent subjects<br>Search modes - Boolean/Phrase                          | Interface - EBSCOhost Research Databases Search Screen - Advanced Search Database - CINAHL | 1,275   |
| S9  | PT editorial or letter | Limiters - Published Date: 20100101-20201231<br>Expanders - Apply related words; Apply equivalent subjects<br>Search modes - Boolean/Phrase                          | Interface - EBSCOhost Research Databases Search Screen - Advanced Search Database - CINAHL | 220,872 |
| S8  | S3 AND S6              | Limiters - Published Date: 20100101-20201231<br>Expanders - Apply related words; Apply equivalent subjects<br>Search modes - Boolean/Phrase                          | Interface - EBSCOhost Research Databases Search Screen - Advanced Search Database - CINAHL | 1,293   |
| S7  | S3 AND S6              | Expanders - Apply related words; Apply equivalent subjects<br>Search modes - Boolean/Phrase                                                                          | Interface - EBSCOhost Research Databases Search Screen - Advanced Search Database - CINAHL | 1,683   |

|    |                                                                                                                                                                                                                                                                                                                                                                                                                                                                                                                                                                                                                                       |                                                                                             |                                                                                                     |        |
|----|---------------------------------------------------------------------------------------------------------------------------------------------------------------------------------------------------------------------------------------------------------------------------------------------------------------------------------------------------------------------------------------------------------------------------------------------------------------------------------------------------------------------------------------------------------------------------------------------------------------------------------------|---------------------------------------------------------------------------------------------|-----------------------------------------------------------------------------------------------------|--------|
| S6 | S4 OR S5                                                                                                                                                                                                                                                                                                                                                                                                                                                                                                                                                                                                                              | Expanders - Apply related words; Apply equivalent subjects<br>Search modes - Boolean/Phrase | Interface - EBSCOhost<br>Research Databases<br>Search Screen - Advanced<br>Search Database - CINAHL | 66,266 |
| S5 | TI (guideline# or "clinical practice guideline" or "clinical practice guidelines" or CPG or CPGs or "evidence-based guideline" or "evidence-based guidelines" or guidance# or standards or consensus* or recommendat* or "practice parameter" or "practice parameters" or "position statement" or "position statements" or "policy statement" or "policy statements") AND (develop* or establish* or ethic* or framework# or implement* or method* or organis* or organiz* or process* or strateg*)                                                                                                                                   | Expanders - Apply related words; Apply equivalent subjects<br>Search modes - Boolean/Phrase | Interface - EBSCOhost<br>Research Databases<br>Search Screen - Advanced<br>Search Database - CINAHL | 46,909 |
| S4 | TI ( ( guideline# or "clinical practice guideline" or "clinical practice guidelines" or CPG or CPGs or "evidence-based guideline" or "evidence-based guidelines") N5 (develop* or establish* or ethic* or framework# or implement* or method* or organis* or organiz* or process* or strateg*) ) OR AB ( ( guideline# or "clinical practice guideline" or "clinical practice guidelines" or CPG or CPGs or "evidence-based guideline" or "evidence-based guidelines") N5 (develop* or establish* or ethic* or framework# or implement* or method* or organis* or organiz* or process* or strateg*) )                                  | Expanders - Apply related words; Apply equivalent subjects<br>Search modes - Boolean/Phrase | Interface - EBSCOhost<br>Research Databases<br>Search Screen - Advanced<br>Search Database - CINAHL | 29,491 |
| S3 | S1 OR S2                                                                                                                                                                                                                                                                                                                                                                                                                                                                                                                                                                                                                              | Expanders - Apply related words; Apply equivalent subjects<br>Search modes - Boolean/Phrase | Interface - EBSCOhost<br>Research Databases<br>Search Screen - Advanced<br>Search Database - CINAHL | 2,489  |
| S2 | TI (guideline# or "clinical practice guideline" or "clinical practice guidelines" or CPG or CPGs or "evidence-based guideline" or "evidence-based guidelines" or guidance# or standards or consensus* or recommendat* or "practice parameter" or "practice parameters" or "position statement" or "position statements" or "policy statement" or "policy statements") AND (deprivation* or deprive or deprived or deprives or depriving or disadvantag* or disparit* or equalit* or equit* or fair or fairness* or inequit* or impoverish* or inequalit* or insecurit* or marginal* or poverty or underserv* or unfair* or vulnerab*) | Expanders - Apply related words; Apply equivalent subjects<br>Search modes - Boolean/Phrase | Interface - EBSCOhost<br>Research Databases<br>Search Screen - Advanced<br>Search Database - CINAHL | 2,175  |
| S1 | TI ( ( guideline# or "clinical practice guideline" or "clinical practice guidelines" or CPG or CPGs or "evidence-based guideline" or "evidence-based guidelines") N5 (deprivation* or deprive or deprived or deprives or depriving or disadvantag* or disparit* or equalit* or equit* or fair or fairness* or inequit* or impoverish* or inequalit* or insecurit* or marginal* or poverty or underserv* or unfair* or vulnerab*) ) OR AB ( ( guideline# or "clinical practice guideline" or "clinical practice                                                                                                                        | Expanders - Apply related words; Apply equivalent subjects<br>Search modes - Boolean/Phrase | Interface - EBSCOhost<br>Research Databases<br>Search Screen - Advanced<br>Search Database - CINAHL | 516    |

|  |                                                                                                                                                                                                                                                                                                                                                          |  |  |  |
|--|----------------------------------------------------------------------------------------------------------------------------------------------------------------------------------------------------------------------------------------------------------------------------------------------------------------------------------------------------------|--|--|--|
|  | guidelines" or CPG or CPGs or "evidence-based guideline" or "evidence-based guidelines") N5 (deprivation* or deprive or deprived or deprives or depriving or disadvantag* or disparit* or equalit* or equit* or fair or fairness* or inequit* or impoverish* or inequalit* or insecurit* or marginal* or poverty or underserv* or unfair* or vulnerab* ) |  |  |  |
|--|----------------------------------------------------------------------------------------------------------------------------------------------------------------------------------------------------------------------------------------------------------------------------------------------------------------------------------------------------------|--|--|--|

## Web of Science

- # 9 [392](#) #6 AND #3  
**Refined by: PUBLICATION YEARS:** ( 2020 OR 2019 OR 2018 OR 2017 OR 2016 OR 2015 OR 2014 OR 2013 OR 2012 OR 2011 OR 2010 ) AND [excluding] **DOCUMENT TYPES:** ( EDITORIAL MATERIAL OR LETTER OR NEWS ITEM )  
 Indexes=SCI-EXPANDED, SSCI, A&HCI, CPCI-S, CPCI-SSH, ESCI Timespan=All years
- # 8 [403](#) #6 AND #3  
**Refined by: PUBLICATION YEARS:** ( 2020 OR 2019 OR 2018 OR 2017 OR 2016 OR 2015 OR 2014 OR 2013 OR 2012 OR 2011 OR 2010 )  
 Indexes=SCI-EXPANDED, SSCI, A&HCI, CPCI-S, CPCI-SSH, ESCI Timespan=All years
- # 7 [551](#) #6 AND #3  
 Indexes=SCI-EXPANDED, SSCI, A&HCI, CPCI-S, CPCI-SSH, ESCI Timespan=All years
- # 6 [136,280](#) #5 OR #4  
 Indexes=SCI-EXPANDED, SSCI, A&HCI, CPCI-S, CPCI-SSH, ESCI Timespan=All years
- # 5 [49,731](#) **TITLE:** ((guideline or guidelines or "clinical practice guideline" or "clinical practice guidelines" or CPG or CPGs or "evidence-based guideline" or "evidence-based guidelines" or guidance\* or standards or consensus\* or recommendat\* or "practice parameter" or "practice parameters" or "position statement" or "position statements" or "policy statement" or "policy statements") AND (develop\* or establish\* or ethic\* or framework\* or implement\* or method\* or organis\* or organiz\* or process\* or strateg\* ) )  
 Indexes=SCI-EXPANDED, SSCI, A&HCI, CPCI-S, CPCI-SSH, ESCI Timespan=All years
- # 4 [98,448](#) **TOPIC:** ((guideline or guidelines or "clinical practice guideline" or "clinical practice guidelines" or CPG or CPGs or "evidence-based guideline" or "evidence-based guidelines") NEAR/5 (develop\* or establish\* or ethic\* or framework\* or implement\* or method\* or organis\* or organiz\* or process\* or strateg\* ) )  
 Indexes=SCI-EXPANDED, SSCI, A&HCI, CPCI-S, CPCI-SSH, ESCI Timespan=All years
- # 3 [3,048](#) #2 OR #1  
 Indexes=SCI-EXPANDED, SSCI, A&HCI, CPCI-S, CPCI-SSH, ESCI Timespan=All years
- # 2 [1,914](#) **TITLE:** ((guideline or guidelines or "clinical practice guideline" or "clinical practice guidelines" or CPG or CPGs or "evidence-based guideline" or "evidence-based guidelines" or guidance\* or standards or consensus\* or recommendat\* or "practice parameter" or "practice parameters" or "position statement" or "position statements" or "policy statement" or "policy statements") AND (deprivation\* or deprive or deprived or deprives or depriving or disadvantag\* or disparit\* or equalit\* or equit\* or fair or fairness\* or inequit\* or impoverish\* or inequalit\* or insecurit\* or marginal\* or poverty or underserv\* or unfair\* or vulnerab\* ) )  
 Indexes=SCI-EXPANDED, SSCI, A&HCI, CPCI-S, CPCI-SSH, ESCI Timespan=All years
- # 1 [1,409](#) **TOPIC:** ((guideline or guidelines or "clinical practice guideline" or "clinical practice guidelines" or CPG or CPGs or "evidence-based guideline" or "evidence-based guidelines") NEAR/5 (deprivation\* or deprive or deprived or deprives or depriving or disadvantag\* or disparit\* or equalit\* or equit\* or fair or fairness\* or inequit\* or impoverish\* or inequalit\* or insecurit\* or marginal\* or poverty or underserv\* or unfair\* or vulnerab\* ) )  
 Indexes=SCI-EXPANDED, SSCI, A&HCI, CPCI-S, CPCI-SSH, ESCI Timespan=All years

### Appendix C. Grey literature website sources

Grey literature searches were conducted using relevant sections of the Canadian Agency for Drugs and Technologies in Health (CADTH) Grey Matters checklist and thorough searches of the following websites:

| Organization                                                          | Website Link                                                                                                      |
|-----------------------------------------------------------------------|-------------------------------------------------------------------------------------------------------------------|
| <b>Canada</b>                                                         |                                                                                                                   |
| <b>Regional/Provincial-level Groups</b>                               |                                                                                                                   |
| UBC's Centre for Health Services and Policy Research (CHSPR)          | <a href="https://chspr.ubc.ca/">https://chspr.ubc.ca/</a>                                                         |
| Alberta Public Health Association (APHA)                              | <a href="https://www.apha.ab.ca/">https://www.apha.ab.ca/</a>                                                     |
| Alberta Health Services                                               | <a href="https://www.albertahealthservices.ca/default.aspx">https://www.albertahealthservices.ca/default.aspx</a> |
| Saskatchewan Health Quality Council                                   | <a href="https://www.hqc.sk.ca/">https://www.hqc.sk.ca/</a>                                                       |
| Manitoba Public Health Association                                    | <a href="https://manitobapha.ca/">https://manitobapha.ca/</a>                                                     |
| Winnipeg Regional Health Authority (WRHA)                             | <a href="https://wrha.mb.ca/health-equity/reports/">https://wrha.mb.ca/health-equity/reports/</a>                 |
| Ontario Ministry of Health and LTC                                    | <a href="http://health.gov.on.ca/en/">http://health.gov.on.ca/en/</a>                                             |
| Ontario Public Health Association (OPHA)                              | <a href="https://opha.on.ca/Home.aspx">https://opha.on.ca/Home.aspx</a>                                           |
| Public Health Ontario (PHO)                                           | <a href="https://www.publichealthontario.ca/">https://www.publichealthontario.ca/</a>                             |
| Wellesley Institute                                                   | <a href="https://www.wellesleyinstitute.com/">https://www.wellesleyinstitute.com/</a>                             |
| Institut national de santé publique du Québec                         | <a href="https://www.inspq.qc.ca/">https://www.inspq.qc.ca/</a>                                                   |
| Quebec Population Health Research Network                             | <a href="https://santepop.qc.ca/en">https://santepop.qc.ca/en</a>                                                 |
| Newfoundland & Labrador Centre For Applied Health Research            | <a href="https://www.nlcahr.mun.ca/">https://www.nlcahr.mun.ca/</a>                                               |
| Public Health Association of Nova Scotia (PHANS)                      | <a href="https://www.phans.ca/">https://www.phans.ca/</a>                                                         |
| <b>National-level Groups</b>                                          |                                                                                                                   |
| Association of Local Public Health Agencies (alPHA)                   | <a href="https://www.alphaweb.org/">https://www.alphaweb.org/</a>                                                 |
| Canadian Association for Health Services and Policy Research (CAHSPR) | <a href="https://cahspr.ca/#home">https://cahspr.ca/#home</a>                                                     |
| Canadian Cancer Society                                               | <a href="https://www.cancer.ca/en/?region=on">https://www.cancer.ca/en/?region=on</a>                             |
| Canadian Institute for Health Information (CIHI)                      | <a href="https://www.cihi.ca/en">https://www.cihi.ca/en</a>                                                       |
| Canadian Public Health Association (CPHA)                             | <a href="https://www.cpha.ca/">https://www.cpha.ca/</a>                                                           |
| The Conference Board of Canada                                        | <a href="https://www.conferenceboard.ca/">https://www.conferenceboard.ca/</a>                                     |
| National Collaborating Centre for Environmental Health (NCCEH)        | <a href="https://ncceh.ca/">https://ncceh.ca/</a>                                                                 |
| <b>International Groups</b>                                           |                                                                                                                   |
| <b>International Organizations</b>                                    |                                                                                                                   |
| Campbell Collaboration                                                | <a href="https://campbellcollaboration.org">https://campbellcollaboration.org</a>                                 |
| Cochrane Methods Equity/ Cochrane                                     | <a href="https://methods.cochrane.org/equity/">https://methods.cochrane.org/equity/</a>                           |
| European Centre for Disease Prevention and Control                    | <a href="https://www.ecdc.europa.eu/en">https://www.ecdc.europa.eu/en</a>                                         |
| European Commission Public Health Guidelines International Network    | <a href="https://ec.europa.eu/health/home_en">https://ec.europa.eu/health/home_en</a>                             |
| Guidelines International Network                                      | <a href="https://g-i-n.net/home">https://g-i-n.net/home</a>                                                       |
| Pan American Health Organization (PAHO)                               | <a href="https://www.paho.org/en">https://www.paho.org/en</a>                                                     |

## List of excluded full-text studies with reasons

### a. Does not address guideline development (n=99)

1. Arnett, D. K. et al. 2019 ACC/AHA Guideline on the Primary Prevention of Cardiovascular Disease: A Report of the American College of Cardiology/American Heart Association Task Force on Clinical Practice Guidelines. *Circulation* 140, e596–e646.
2. Ward, M. et al. A conceptual framework for evaluating health equity promotion within community-based participatory research partnerships. *Evaluation & Program Planning* 70, 25–34.
3. Glover, R. E. et al. A framework for identifying and mitigating the equity harms of COVID-19 policy interventions. *Journal of Clinical Epidemiology* 15 (2020).
4. Ilton, M. K. et al. A framework for overcoming disparities in management of acute coronary syndromes in the Australian Aboriginal and Torres Strait Islander population. A consensus statement from the National Heart Foundation of Australia. *Medical Journal of Australia* 200, 639–643 (2014).
5. National Collaborating Centre for Determinants of Health. A guide to assessment tools for organizational health equity capacity. (2020).
6. D'Alton, P. & Reygan, F. C. G. A pilot training program for health care professionals providing palliative and oncological care to Lesbian, Gay and Bisexual (LGB) patients. *Psycho-Oncology* 20, 131–132 (2011).
7. Jackson, F. M. et al. A Prematurity Collaborative Birth Equity Consensus Statement for Mothers and Babies. *Maternal & Child Health Journal* 24, 1231–1237 (2020).
8. Kano, M. et al. Addressing Cancer Disparities in SGM Populations: Recommendations for a National Action Plan to Increase SGM Health Equity Through Researcher and Provider Training and Education. *Journal of Cancer Education* 35, 44–53.
9. Parsons, S. Addressing Racial Biases in Medicine: A Review of the Literature, Critique, and Recommendations. *International Journal of Health Services* 50, 371–386 (2020).
10. Hernández-Cancio, S., Albritton, E. & Fishman, E. Advancing A Health System Transformation Agenda Focused On Achieving Health Equity. *Health Affairs* 7.
11. Ogbolu, Y. & Fitzpatrick, G. A. Advancing Organizational Cultural Competency With Dissemination and Implementation Frameworks: Towards Translating Standards into Clinical Practice. *Advances in Nursing Science* 38, 203–214 (2015).
12. Ju, M. et al. Affordable Care Act Medicaid expansion does not reduce guideline concordant cancer care disparities in vulnerable populations. *Journal of Clinical Oncology*. Conference 38, (2020).
13. Nunn, A. et al. African American Community Leaders' Policy Recommendations for Reducing Racial Disparities in HIV Infection, Treatment, and Care: Results From a Community-Based Participatory Research Project in Philadelphia, Pennsylvania. *Health Promotion Practice* 16, 91–100 (2015).
14. Griggs, J. et al. American Society of Clinical Oncology Position Statement: Strategies for Reducing Cancer Health Disparities Among Sexual and Gender Minority Populations. *Journal of Clinical Oncology* 35, 2203–2208 (2017).
15. Legha, R. K. & Miranda, J. An Anti-Racist Approach to Achieving Mental Health Equity in Clinical Care. *Psychiatric Clinics of North America* 43, 451–469 (2020).
16. National Institute for Health and Care Excellence. Annual Equality Report 2016-17. (2017).
17. National Institute for Health and Care Excellence. Annual Equality Report 2017-18. (2018).
18. National Institute for Health and Care Excellence. Annual Equality Report 2018/19. (2019).
19. Mulley, C., Ma, L., Clifton, G. & Tanner, M. Are Network Planning Guidelines Based on Equal Access Equitable? *Transp. Res. Record* 1–11 (2017) doi:10.3141/2651-01.
20. Silva, A., Rauscher, G. H., Hoskins, K., Rao, R. & Ferrans, C. E. Assessing racial/ethnic disparities in chemotherapy treatment among breast cancer patients in context of changing treatment guidelines. *Breast Cancer Research & Treatment* 142, 667–672 (2013).
21. Baltussen, R. et al. Balancing efficiency, equity and feasibility of HIV treatment in South Africa - development of programmatic guidance. *Cost Effectiveness & Resource Allocation* 11, 26 (2013).

22. Gonzalez, V., Lara, O. D., Kamath, P. N. & Aguilar, V. D. C. Bridging the disparities gap: Implementation of a clinical practice guideline. *Gynecologic Oncology* 154 (Supplement 1), 115 (2019).
23. Elijah Herington, A. S., Deirdre DeJean, Charlene Argáez. Building Inclusive Health Care Services: A Rapid Qualitative Review. (2020).
24. CDC COVID-19 Response Health Equity Strategy. 5.
25. Payne, G. H. et al. CDC's Health Equity Resource Toolkit: Disseminating Guidance for State Practitioners to Address Obesity Disparities. *Health Promotion Practice* 16, 84–90 (2015).
26. Porcherie, M., Le Bihan-Youinou, B. & Pommier, J. Changing modalities of action to address social inequalities in health in international and French policy recommendations. *Sante Publique (Vandoeuvre-Les-Nancey)* 30, 33–46 (2018).
27. Welch, V. A. et al. Chapter 16: Equity and specific populations. *Cochrane Training* 32.
28. Polite, B. N. et al. Charting the Future of Cancer Health Disparities Research: A Position Statement from the American Association for Cancer Research, the American Cancer Society, the American Society of Clinical Oncology, and the National Cancer Institute. *Cancer Research* 77, 4548–4555.
29. Omenukor, K. Colorectal Cancer Awareness and Screening Guideline for African American Popula. *Colorectal Cancer Awareness & Screening Guideline For African American Popula* 1–1 (2018).
30. Eslava-Schmalbach, J. et al. Conceptual framework of equity-focused implementation research for health programs (EquiR). *Int J Equity Health* 18, 80 (2019).
31. Plamondon, K. M., C. S. Cajax, Ian D. Graham & Joan L. Bottorff. Connecting knowledge with action for health equity: a critical interpretive synthesis of promising practices. *International Journal for Equity in Health* 18, (2019).
32. Robertson, K. N. Considering the Social Determinants of Equity in International Development Evaluation Guidance Documents. *Can. J. Program Eval.* 30, 344–373 (2016).
33. Belot, A. et al. Describing the association between socioeconomic inequalities and cancer survival: methodological guidelines and illustration with population-based data. *Clinical Epidemiology* 10, 561–573 (2018).
34. Goodman, M. S., Gilbert, K. L., Hudson, D., Milam, L. & Colditz, G. A. Descriptive Analysis of the 2014 Race-Based Healthcare Disparities Measurement Literature. *Journal of Racial & Ethnic Health Disparities* 29, 29 (2016).
35. Ngongo, P. et al. Developing standards of care for HIV prevention research in developing countries – a case study of 10 research centers in Eastern and Southern Africa. *AIDS Care* 24, 1277–1289 (2012).
36. Ahmed, S., Shahid, R. K. & Episkenew, J. A. Disparity in cancer prevention and screening in aboriginal populations: recommendations for action. *Current Oncology* 22, 417–426 (2015).
37. Jull, J. et al. Engaging knowledge users in development of the CONSORT-Equity 2017 reporting guideline: a qualitative study using in-depth interviews. *Research Involvement & Engagement* 4, 34 (2018).
38. Browne, A. J. et al. Enhancing health care equity with Indigenous populations: evidence-based strategies from an ethnographic study. *BMC Health Services Research* 16, 544.
39. Canadian Medical Association. Equity and Diversity in Medicine. 5 (2019).
40. Pan American Health Organization. Office of External Relations. Equity in Health Policy Assessment : Region of the Americas. (Pan American Health Organization, 2002).
41. Pinto, A. D. et al. Equity in public health standards: a qualitative document analysis of policies from two Canadian provinces. *International Journal for Equity in Health* 11, 28–37 (2012).
42. Vallgarda, S. Ethics, equality and evidence in health promotion Danish guidelines for municipalities. *Scandinavian Journal of Public Health* 42, 337–343 (2014).
43. Welch, V. et al. Extending the PRISMA statement to equity-focused systematic reviews (PRISMA-E 2012): explanation and elaboration. *Journal of Clinical Epidemiology* 70, 68–89 (2016).
44. Matsuda, Y., Brooks, J. L. & Beeber, L. S. Guidelines for research recruitment of underserved populations (EERC). *Applied Nursing Research* 32, 164–170.
45. Crowshoe, L. et al. Health and Health Care Implications of Systemic Racism on Indigenous Peoples in Canada. 10.

- 1
  - 2
  - 3
  - 4
  - 5
  - 6
  - 7
  - 8
  - 9
  - 10
  - 11
  - 12
  - 13
  - 14
  - 15
  - 16
  - 17
  - 18
  - 19
  - 20
  - 21
  - 22
  - 23
  - 24
  - 25
  - 26
  - 27
  - 28
  - 29
  - 30
  - 31
  - 32
  - 33
  - 34
  - 35
  - 36
  - 37
  - 38
  - 39
  - 40
  - 41
  - 42
  - 43
  - 44
  - 45
  - 46
  - 47
  - 48
  - 49
  - 50
  - 51
  - 52
  - 53
  - 54
  - 55
  - 56
  - 57
  - 58
  - 59
  - 60
46. Marcela Valencia, Diego Fernando Rojas Gualdrón, Jorge Hernán García Restrepo & Manuela Berrío Bedoya. Health and implementation outcomes in primary health care strategies. Lessons learned to achieve health equity through health policy. A systematic review. PROSPERO CRD42019127991, (2019).
47. Population and Public Health Division, M. of H. and L.-T. C. Health Equity Guideline, 2018. Toronto, ON: Queen's Printer for Ontario. 20 (2018).
48. CIHR Institute of Population and Public Health. Health Equity Matters. (2015).
49. WHO. Health Equity Policy Tool: A framework to track policies for increasing health equity in the WHO European Region. (2019).
50. National Center for Chronic Disease Prevention and Health Promotion. Health Equity Resource Toolkit for State Practitioners Addressing Obesity Disparities. 83.
51. Welch, V. A. et al. Health equity: evidence synthesis and knowledge translation methods. *Systematic Reviews* 2, 43 (2013).
52. Health Quality Ontario. Health Technology Assessments Methods and Process Guide. (2018).
53. WHO. Healthy, prosperous lives for all: the European Health Equity Status Report. (2019).
54. Van Vliet, J. How to apply the evidence-based recommendations for greater health equity into policymaking and action at the local level? *Scandinavian Journal of Public Health* 46, 28–36 (2018).
55. Rodriguez, F. & Ferdinand, K. C. Hypertension in Minority Populations: New Guidelines and Emerging Concepts. *Advances in Chronic Kidney Disease* 22, 145–153 (2015).
56. Williams, S. K., Ravenell, J., Seyedali, S., Nayef, S. & Ogedegbe, G. Hypertension Treatment in Blacks: Discussion of the U.S. Clinical Practice Guidelines. *Progress in Cardiovascular Diseases* 59, 282–288 (2016).
57. Holliman, K. et al. Implementation of Hemorrhage Guidelines Reveals Racial Disparities in Transfusion Requirements. *Obstet. Gynecol.* 135, 139S-139S (2020).
58. Teunissen, E. et al. Implementing guidelines and training initiatives to improve cross-cultural communication in primary care consultations: a qualitative participatory European study. *International Journal for Equity in Health* 16, 32.
59. Westby, C. Implementing recommendations of the World Report on Disability for indigenous populations. *International Journal of Speech-Language Pathology* 15, 96–100 (2013).
60. Sastre, F., Rojas, P., Cyrus, E., De La Rosa, M. & Khoury, A. H. Improving the health status of Caribbean people: recommendations from the Triangulating on Health Equity summit. *Global Health Promotion* 21, 19–28 (2014).
61. Mumtaz, Z., Salway, S. & Nyagero, J. Improving the standards-based management: recognition initiative to provide high-quality, equitable maternal health services in Malawi. An implementation research protocol (vol 1, 2016). *BMJ Glob. Health* 1, 1 (2016).
62. Chase Simms. Increasing Organizational Capacity for Health Equity Work: A Literature Review for Health Nexus. 39 (2017).
63. Scime, S. Inequities in cancer care among transgender people: Recommendations for change. *Canadian Oncology Nursing Journal* 29, 87–96 (2019).
64. Hassen, N., Tyler, I. & Manson, H. Influence of revised public health standards on health equity action: a qualitative study in Ontario, Canada. *International Journal for Equity in Health* 16, 1–11 (2017).
65. Baumann, S. D. et al. INFUSING CULTURAL COMPETENCE TRAINING INTO D ISABILITY LEADERSHIP PROGRAMS: PERCEPTIONS AND RECOMMENDATIONS. *Journal of Cultural Diversity* 27, 31–46 (2020).
66. Laura Anderson & Seong-gee Um. *International Review of Health Equity Strategies*. (2016).
67. Saunders, M., Barr, B., McHale, P. & Hamelmann, C. Key policies for addressing the social determinants of health and health inequities. (2017).
68. Penman-Aguilar, A. et al. Measurement of Health Disparities, Health Inequities, and Social Determinants of Health to Support the Advancement of Health Equity: *Journal of Public Health Management and Practice* 22, S33–S42 (2016).
69. Mukerjee, R. Mental Health in the Primary Care of Trans Patients. *Mental Health in the Primary Care of Trans Patients* 1–1 (2017).
70. Office of Minority Health. National Standards for Culturally and Linguistically Appropriate Services (CLAS) in Health and Health Care. 2 <https://thinkculturalhealth.hhs.gov/clas>.



- 1
- 2
- 3 71. Ismail, S. J., Matthew C. Tunis, Linlu Zhao & Caroline Quach. Navigating Inequities: A
- 4 roadmap out of the pandemic. 15 (2020).
- 5 72. New Zealand Medical, A. New Zealand Medical Association. Health equity position statement.
- 6 New Zealand Medical Journal 124, 10-following 86 (2011).
- 7 73. Mantoura, P. & Morrison, V. Policy Approaches to Reducing Health Inequalities. (2016).
- 8 74. Ontario Public Health Association. Position Statement on Applying a Health Equity Lens.
- 9 75. Government of Canada. Preliminary guidance on key populations for early COVID-19
- 10 immunization. (2020).
- 11 76. Haggerty, J. et al. Proactive Strategies to Address Health Equity and Disparities:
- 12 Recommendations from a Bi-National Symposium. *Journal of the American Board of Family*
- 13 *Medicine: JABFM* 31, 479–483 (2018).
- 14 77. Carrillo Zuniga, G., Yoon-Ho, S., Dadig, B., Kent Guion, W. & Rice, V. Progression in
- 15 Understanding and Implementing the Cultural and Linguistic Appropriate Services Standards.
- 16 *Health Care Manager* 32, 167–172 (2013).
- 17 78. Plamondon, K. M. Promising practices for connecting knowledge to action for health equity.
- 18 (The University of British Columbia, 2019).
- 19 79. Albanti, I. & Baker, K. Promoting consistency, fairness, and transparency: Development and
- 20 implementation of partnership eligibility criteria and selection process guidelines for the global
- 21 health initiative. *Pediatric Blood and Cancer* 63 (Supplement 3), S149 (2016).
- 22 80. Community Preventive Services Task Force. Promoting Health Equity Through Education
- 23 Programs and Policies: Center Based Early Childhood Education. (2016).
- 24 81. Community Preventive Services Task Force. Promoting Health Equity Through Education
- 25 Programs and Policies: Full-Day Kindergarten Programs Task Force Finding and Rationale
- 26 Statement.
- 27 82. Community Preventive Services Task Force. Promoting Health Equity Through Education
- 28 Programs and Policies: School Based Health Centers. (2016).
- 29 83. Sampson, U. K. A. et al. Reducing Health Inequities in the U.S.: Recommendations From the
- 30 NHLBI's Health Inequities Think Tank Meeting. *Journal of the American College of Cardiology*
- 31 68, 517–524.
- 32 84. Petkovic, J. et al. Reporting of health equity considerations in cluster and individually
- 33 randomized trials. *Trials [Electronic Resource]* 21, 308 (2020).
- 34 85. McKenzie, K., Metcalfe, D., Murray, G. & Michie, A. Service provision in Scotland for people
- 35 with an intellectual disability and dementia: adherence to good practice guidelines. *Learning*
- 36 *Disability Practice* 22, 26–33 (2019).
- 37 86. Tannenbaum, C., Clow, B., Haworth-Brockman, M. & Voss, P. Sex and gender considerations
- 38 in Canadian clinical practice guidelines: a systematic review. *CMAJ open* 5, E66–E73 (2017).
- 39 87. Heidari, S., Babor, T. F., Castro, P., Tort, S. & Curno, M. Sex and Gender Equity in Research:
- 40 rationale for the SAGER guidelines and recommended use. *Epidemiologia e Servicos de*
- 41 *Saude* 26, 665–675 (2017).
- 42 88. WHO. Strategic mapping of institutional frameworks and their approach to equity.
- 43 89. Scharffscher, K. S. & Olsen, O. E. Strengthening women's security in crisis? The virtual
- 44 implementation of strategies and guidelines. *Journal of Emergency Management* 9, 49–59
- 45 (2011).
- 46 90. K. Bergeron. Supporting the policy-making process: A workbook. (2018).
- 47 91. Jull, J. et al. Taking an integrated knowledge translation approach in research to develop the
- 48 CONSORT-Equity 2017 reporting guideline: an observational study. *BMJ Open* 9, e026866.
- 49 92. Burford, B. J. et al. Testing the PRISMA-Equity 2012 reporting guideline: the perspectives of
- 50 systematic review authors. *PLoS ONE [Electronic Resource]* 8, e75122 (2013).
- 51 93. Spitzer-Shohat, S. & Chin, M. The 'waze' of inequity reduction frameworks for organizations.
- 52 *International Journal of Integrated Care (IJIC)* 19, 1–2 (2019).
- 53 94. De Marchis, E. H., Willard-Grace, R., Olayiwola, J. N. & Doekhie, K. The Impact of the Patient-
- 54 Centered Medical Home on Health Care Disparities: Exploring Stakeholder Perspectives on
- 55 Current Standards and Future Directions. *Population Health Management* 22, 99–107 (2019).
- 56 95. Guichard, A., Ridde, V., Nour, K. & Lafontaine, G. The REFLEX-ISS tool: taking better
- 57 account of social inequalities in health. [http://www.equitesante.org/chair-realisme/tools/reflex-](http://www.equitesante.org/chair-realisme/tools/reflex-iss/)
- 58 [iss/](http://www.equitesante.org/chair-realisme/tools/reflex-iss/) (2015).
- 59
- 60

96. Woolfenden, S. et al. The Royal Australasian College of Physicians Paediatric & Child Health Division 145 Macquarie Street, Sydney, NSW, 2000 Summary of position statement on inequities in child health Published by RACP May 2018 and available at: <https://www.racp.edu.au/advocac>. *Journal of Paediatrics & Child Health* 54, 832–833.
97. Dankwa-Mullan, I. et al. The science of eliminating health disparities: summary and analysis of the NIH Summit recommendations. *American Journal of Public Health* 100, S12-8 (2010).
98. Mills, S. L., Brady, T. J., Jayanthan, J., Ziabakhsh, S. & Sargious, P. M. Toward consensus on self-management support: the international chronic condition self-management support framework. *Health Promotion International* 32, 942–952 (2017).
99. Aldrich, M. et al. Who Gets Screened for Lung Cancer? A Simple Adjustment to Current Guidelines to Reduce Racial Disparities. *Journal of Thoracic Oncology* 13 (10 Supplement), S426–S427 (2018).

**b. Does not address health equity (n=19)**

1. Arnett, D. K. et al. 2019 ACC/AHA Guideline on the Primary Prevention of Cardiovascular Disease: Executive Summary: A Report of the American College of Cardiology/American Heart Association Task Force on Clinical Practice Guidelines. *Circulation* 140, e563–e595.
2. Dainton, C., Chu, C. H., Lin, H., Cherniak, W. & Loh, L. C. A Protocol to Develop Practice Guidelines for Primary Care Medical Service Trips. *Annals of Global Health* 82, 678–685 (2016).
3. Mahoney, A. D., Westphaln, K. K., Covelli, A. F. & Mullan, F. Advancing Social Mission in Nursing Education: Recommendations From an Expert Advisory Board. *Journal of Nursing Education* 59, 433–433 (2020).
4. Stratil, J. M. et al. Advancing the WHO-INTEGRATE Framework as a Tool for Evidence-Informed, Deliberative Decision-Making Processes: Exploring the Views of Developers and Users of WHO Guidelines. *International Journal of Health Policy & Management* 27, 27 (2020).
5. Hunter, J., Leach, M., Braun, L. & Bensoussan, A. An interpretive review of consensus statements on clinical guideline development and their application in the field of traditional and complementary medicine. *BMC Complementary & Alternative Medicine* 17, 1–11 (2017).
6. Frank, J. & Haw, S. Best practice guidelines for monitoring socioeconomic inequalities in health status: lessons from Scotland. *Milbank Quarterly* 89, 658–693 (2011).
7. Lee, Y. & McIntyre, R. Disparities in the Development and Implementation of Guidelines for the Management of Depression in Adults. *Biological Psychiatry* 87 (9 Supplement), S382 (2020).
8. DeMartino, J. K. & Larsen, J. K. Equity in cancer care: pathways, protocols, and guidelines. *Journal of the National Comprehensive Cancer Network* 10 Suppl 1, S1-9 (2012).
9. Leung, T. I. & Dumontier, M. FAIR Principles for Clinical Practice Guidelines in a Learning Health System. *Studies in Health Technology & Informatics* 264, 1690–1691 (2019).
10. Milnes, K. III. Challenging the Sexual Double Standard: Constructing Sexual Equality Narratives as a Strategy of Resistance. *Feminism Psychol.* 20, 255–259 (2010).
11. Nair, M. et al. Improving the Quality of Health Care Services for Adolescents, Globally: A Standards-Driven Approach. *Journal of Adolescent Health* 57, 288–298 (2015).
12. King, D., Wright, D., Gallagher, R., Allen, L. & Wakefield, K. IPS & RCN Position Statement: Equity and excellence: Liberating the NHS Securing continuing infection prevention support for NHS England. *Journal of Infection Prevention* 12, 97–100 (2011).
13. van Munster, B. C., Portielje, J. E. A., Maier, A. B., Arends, A. J. & de Beer, J. J. A. Methodology for senior-proof guidelines: A practice example from the Netherlands. *Journal of Evaluation in Clinical Practice* 24, 254–257 (2018).
14. Health Quality Ontario. *Quality Matters: Realizing Excellent Care for All.* (2017).
15. St-Pierre, L. *Selected Tools to Facilitate the Integration of Health in All Policies.* 14 (2017).
16. Utrankar, A. et al. Technology use and preferences to support clinical practice guideline awareness and adherence in individuals with sickle cell disease. *Journal of the American Medical Informatics Association* 25, 976–988.

17. Bracken-Roche, D., Bell, E., Macdonald, M. E. & Racine, E. The concept of 'vulnerability' in research ethics: an in-depth analysis of policies and guidelines (vol 15, pg 8 ,2017). *Health Res. Policy Syst.* 15, 4 (2017).
18. Chou, R. et al. The Global Spine Care Initiative: applying evidence-based guidelines on the non-invasive management of back and neck pain to low- and middle-income communities. *European Spine Journal* 27, 851–860.
19. Gandjour, A. Welfare gains and losses caused by clinical practice guidelines. *Expert Review of Pharmacoeconomics and Outcomes Research* 14, 27–33 (2014).

**c. Ineligible study design (n=16)**

1. Anderson, M. G. et al. A clinical perspective of the U.S. anti-vaccination epidemic: Considering marginal costs and benefits, CDC best practices guidelines, free riders, and herd immunity. *Vaccine* 38, 7877–7879 (2020).
2. Iyer, A., Srinidhi, V., Sreevathsa, A. & Sen, G. Adapting maternal health practice to co-morbidities and social inequality: A systematic approach. *Canadian journal of public health = Revue canadienne de sante publique* 108, 448–451 (2017).
3. NHS. Equality and Health Inequality NHS RightCare Packs.
4. Anderson, B. O. Evidence-based methods to address disparities in global cancer control: The development of guidelines in Asia. *The Lancet Oncology* 14, 1154–1155 (2013).
5. Szychlinski, C. et al. Food allergy emergency preparedness in Illinois schools: rural disparity in guideline implementation. *The Journal of Allergy & Clinical Immunology in Practice* 3, 805–807.e808 (2015).
6. Adami, G. et al. Gender disparity in authorship of guidelines and recommendations in rheumatology. *Annals of the Rheumatic Diseases* 79, 1122–1123.
7. Ravinetto, R. et al. Governance and Standards in International Clinical Research: The Role of Transnational Consortia. *American Journal of Bioethics* 16, 59–61 (2016).
8. van Leeuwen, D. Health Equity: A Key CDS Component. *Health Equity* 3.
9. Haack, L. M., Meza, J., Jiang, Y. Y., Araujo, E. A. & Pffner, L. Influences to ADHD Problem Recognition: Mixed-Method Investigation and Recommendations to Reduce Disparities for Latino Youth (vol 45, pg 958, 2018). *Adm. Policy. Ment. Health* 45, 978–978 (2018).
10. New Standards will help organizations improve quality of care and reduce health disparities. *Minority Nurse* 4–4 (2013).
11. Clendon, J. & Manson, L. NZ nurses organisation comments on NZMA health equity position statement. *New Zealand Medical Journal* 124, (1331).
12. Cochrane Methods Equity. PROGRESS-Plus. Cochrane Methods Equity <https://methods.cochrane.org/equity/projects/evidence-equity/progress-plus#:~:text=PROGRESS%2DPlus%20is%20an%20acronym,stratify%20health%20opportunities%20and%20outcomes.&text=References%3A&text=Health%20promotion%2C%20inequalities%20and%20young,A%20syste>.
13. Adami, G. et al. Response to: 'Correspondence on "Gender disparity in authorship of guidelines and recommendations in rheumatology"' by Stewart et al. *Annals of the Rheumatic Diseases* 03, 03 (2020).
14. De Castro, P., Heidari, S. & Babor, T. F. Sex And Gender Equity in Research (SAGER): reporting guidelines as a framework of innovation for an equitable approach to gender medicine. *Commentary. Annali Dell'Istituto Superiore di Sanita* 52, 154–157 (2016).
15. Ijaz, N. & Boon, H. Statutory Regulation of Traditional Medicine Practitioners and Practices: The Need for Distinct Policy Making Guidelines. *Journal of Alternative & Complementary Medicine* 24, 307–313 (2018).
16. Karice Hyun & Sarah Richtering. The effect of socioeconomic disadvantage on prescription of guideline-recommended medications for patients with acute coronary syndrome: systematic review and meta-analysis. PROSPERO CRD42016048503, (2016).

**d. Not published in English or French (n=8)**

1. Teufer, B. et al. *Zeitschrift fur Evidenz Fortbildung und Qualitat im Gesundheitswesen* 156–157, 105–112 (2020).

2. Reiter-Theil, S. et al. Clinical ethics as partnership-or how an ethical guideline on fair resource-allocation can be developed and implemented in the clinic. *Ethik Med.* 23, 93–105 (2011).
  3. Welch, V. et al. Extensión PRISMA-Equidad 2012: guías para la escritura y la publicación de revisiones sistemáticas enfocadas en la equidad en salud. *Pan American Journal of Public Health* 34, 60–67 (2013).
  4. Teufer, B. et al. GRADE equity guidelines 1: Considering health equity in GRADE guideline development - introduction and rationale. *Zeitschrift fur Evidenz Fortbildung und Qualitat im Gesundheitswesen* 146, 53–59 (2019).
  5. Nusbaumer-Streit, B. et al. GRADE equity guidelines 2: Considering health equity in GRADE guideline development - equity extension of the guideline development checklist. *Zeitschrift fur Evidenz Fortbildung und Qualitat im Gesundheitswesen* 147–148, 120–126 (2019).
  6. Ebenberger, A. et al. GRADE equity guidelines 3: considering health equity in GRADE guideline development: rating the certainty of synthesized evidence. *Zeitschrift fur Evidenz Fortbildung und Qualitat im Gesundheitswesen* 153–154, 119–125 (2020).
  7. Acosta, N., Pollard, J., Mosquera, P. & Reveiz, L. The concept of equity when developing clinical practice guidelines. *Revista de Salud Publica* 13, 327–338 (2011).
  8. Wang, Z. et al. The consideration of health equity by GRADE. [Chinese]. *Chinese Journal of Evidence-Based Medicine* 18, 746–752 (2018).
- e. Unavailable full-text (n=5)**
1. Spooner, C., Harris, M. F. & Denney-Wilson, E. Centre for obesity management and prevention research excellence in primary health care. *Obesity Research and Clinical Practice* 7, e71 (2013).
  2. Bortolami, S. Immigrant women, health inequality and gender determiners: Development guidelines for a gender-oriented health systems: Padua hospital corporation experience. *Gender Medicine* 7 (5), 518 (2010).
  3. Eslava-Schmalbach, J. H., Vargas, G. S. & Mosquera, P. A. INCORPORATING EQUITY INTO DEVELOPING AND IMPLEMENTING EVIDENCE-BASED CLINICAL PRACTICE GUIDELINES. *Value Health* 14, A565–A565 (2011).
  4. Eslava-Schmalbach, J. H., Sandoval Vargas, G. & Mosquera, P. A. Incorporating equity into developing and implementing evidencebased clinical practice guidelines. *Value in Health* 14 (7), A565 (2011).
  5. Pianarosa, E. et al. Supporting Equity Through Rheumatoid Arthritis Treatment Guidelines: The Development of Logic Models for Six Populations at Risk for Inequitable Outcomes in Canada. *J. Rheumatol.* 47, 1083–1084 (2020).
- f. Duplicate (n=5)**
1. O Dewidar et al. Assessment of health equity considerations in WHO guidelines from 2014-2019: A cross-sectional survey. *Advances in Evidence Synthesis: special issue Cochrane Database of Systematic Reviews* 2020 9, (2020).
  2. Pottie, K. et al. GRADE Equity Guidelines 4: Guidance on how to assess and address health equity within the evidence to decision process. 17 (2019).
  3. Pauly, B. et al. Health Equity Tools. [www.uvic.ca/elph](http://www.uvic.ca/elph).
  4. Health Quality Ontario. Insights into Quality Improvement, Health equity in the 2016/17 Quality Improvement Plans. 16.
  5. Scottish Intercollegiate Guidelines Network (SIGN). *Sign 50: a guideline developer's handbook*. (SIGN, 2015).
